# Supplementary material for: Directed evolution of CRISPR-Cas9 to increase its specificity
Source: PubMed Central journal article supplement (PMC6078992; doi:10.1038/s41467-018-05477-x), 2018-08-06
Supplement: 41467_2018_5477_MOESM3_ESM.pdf [file 41467_2018_5477_MOESM3_ESM.pdf]

## **Description of Additional Supplementary Files**

File Name: Supplementary Data 1

Description: Protein and DNA sequence alignment of Cas9 variants used in this study
