# Supplementary material for: Directed evolution of CRISPR-Cas9 to increase its specificity
Source: PubMed Central journal article supplement (PMC6078992; doi:10.1038/s41467-018-05477-x), 2018-08-06
Supplement: 41467_2018_5477_MOESM4_ESM.pdf [file 41467_2018_5477_MOESM4_ESM.pdf]

## Supplementary Data 1. Protein sequence alignment of Cas9 variants used in this study

|           |   |                                                              |
|-----------|---|--------------------------------------------------------------|
| Clone-1   | 1 | MDKKYSIGLDIGTNSVGWAVITDEYKVPSSKFKVLGNTDRHSIKKNLIGALLFDSGETAE |
| Clone-2   | 1 | MDKKYSIGLDIGTNSVGWAVITDEYKVPSSKFKVLGNTDRHSIKKNLIGALLFDSGETAE |
| Clone-3   | 1 | MDKKYSIGLDIGTNSVGWAVITDEYKVPSSKFKVLGNTDRHSIKKNLIGALLFDSGETAE |
| WT-Cas9   | 1 | MDKKYSIGLDIGTNSVGWAVITDEYKVPSSKFKVLGNTDRHSIKKNLIGALLFDSGETAE |
| eSpCas9   | 1 | MDKKYSIGLDIGTNSVGWAVITDEYKVPSSKFKVLGNTDRHSIKKNLIGALLFDSGETAE |
| Cas9-HF1  | 1 | MDKKYSIGLDIGTNSVGWAVITDEYKVPSSKFKVLGNTDRHSIKKNLIGALLFDSGETAE |
| evo-Cas9  | 1 | MDKKYSIGLDIGTNSVGWAVITDEYKVPSSKFKVLGNTDRHSIKKNLIGALLFDSGETAE |
| Hypa-Cas9 | 1 | MDKKYSIGLDIGTNSVGWAVITDEYKVPSSKFKVLGNTDRHSIKKNLIGALLFDSGETAE |
| xCas9-3.7 | 1 | MDKKYSIGLDIGTNSVGWAVITDEYKVPSSKFKVLGNTDRHSIKKNLIGALLFDSGETAE |

|           |    |                                                              |
|-----------|----|--------------------------------------------------------------|
| Clone-1   | 61 | ATRLKRTARRRYTRRKNRICYLQEIFSNEMAKVDDSFHRLLEESFLVEEDKKHERHPIFG |
| Clone-2   | 61 | ATRLKRTARRRYTRRKNRICYLQEIFSNEMAKVDDSFHRLLEESFLVEEDKKHERHPIFG |
| Clone-3   | 61 | ATRLKRTARRRYTRRKNRICYLQEIFSNEMAKVDDSFHRLLEESFLVEEDKKHERHPIFG |
| WT-Cas9   | 61 | ATRLKRTARRRYTRRKNRICYLQEIFSNEMAKVDDSFHRLLEESFLVEEDKKHERHPIFG |
| eSpCas9   | 61 | ATRLKRTARRRYTRRKNRICYLQEIFSNEMAKVDDSFHRLLEESFLVEEDKKHERHPIFG |
| Cas9-HF1  | 61 | ATRLKRTARRRYTRRKNRICYLQEIFSNEMAKVDDSFHRLLEESFLVEEDKKHERHPIFG |
| evo-Cas9  | 61 | ATRLKRTARRRYTRRKNRICYLQEIFSNEMAKVDDSFHRLLEESFLVEEDKKHERHPIFG |
| Hypa-Cas9 | 61 | ATRLKRTARRRYTRRKNRICYLQEIFSNEMAKVDDSFHRLLEESFLVEEDKKHERHPIFG |
| xCas9-3.7 | 61 | ATRLKRTARRRYTRRKNRICYLQEIFSNEMAKVDDSFHRLLEESFLVEEDKKHERHPIFG |

|           |     |                                                                |
|-----------|-----|----------------------------------------------------------------|
| Clone-1   | 121 | NIVDEVAYHEKYPTIYHLRKKLV DSTDKADLR LIYLALAHMIKFRGHFLIEGDLNPDNSD |
| Clone-2   | 121 | NIVDEVAYHEKYPTIYHLRKKLV DSTDKADLR LIYLALAHMIKFRGHFLIEGDLNPDNSD |
| Clone-3   | 121 | NIVDEVAYHEKYPTIYHLRKKLV DSTDKADLR LIYLALAHMIKFRGHFLIEGDLNPDNSD |
| WT-Cas9   | 121 | NIVDEVAYHEKYPTIYHLRKKLV DSTDKADLR LIYLALAHMIKFRGHFLIEGDLNPDNSD |
| eSpCas9   | 121 | NIVDEVAYHEKYPTIYHLRKKLV DSTDKADLR LIYLALAHMIKFRGHFLIEGDLNPDNSD |
| Cas9-HF1  | 121 | NIVDEVAYHEKYPTIYHLRKKLV DSTDKADLR LIYLALAHMIKFRGHFLIEGDLNPDNSD |
| evo-Cas9  | 121 | NIVDEVAYHEKYPTIYHLRKKLV DSTDKADLR LIYLALAHMIKFRGHFLIEGDLNPDNSD |
| Hypa-Cas9 | 121 | NIVDEVAYHEKYPTIYHLRKKLV DSTDKADLR LIYLALAHMIKFRGHFLIEGDLNPDNSD |
| xCas9-3.7 | 121 | NIVDEVAYHEKYPTIYHLRKKLV DSTDKADLR LIYLALAHMIKFRGHFLIEGDLNPDNSD |

|           |     |                                                                 |
|-----------|-----|-----------------------------------------------------------------|
| Clone-1   | 181 | VDKLF IQLVQTYNQLFEENP INASGVDAKAIL SARLSKSRRENLI AQLPGEKKNGLFGN |
| Clone-2   | 181 | VDKLF IQLVQTYNQLFEENP INASGVDAKAIL SARLSKSRRENLI AQLPGEKKNGLFGN |
| Clone-3   | 181 | VDKLF IQLVQTYNQLFEENP INASGVDAKAIL SARLSKSRRENLI AQLPGEKKNGLFGN |
| WT-Cas9   | 181 | VDKLF IQLVQTYNQLFEENP INASGVDAKAIL SARLSKSRRENLI AQLPGEKKNGLFGN |
| eSpCas9   | 181 | VDKLF IQLVQTYNQLFEENP INASGVDAKAIL SARLSKSRRENLI AQLPGEKKNGLFGN |
| Cas9-HF1  | 181 | VDKLF IQLVQTYNQLFEENP INASGVDAKAIL SARLSKSRRENLI AQLPGEKKNGLFGN |
| evo-Cas9  | 181 | VDKLF IQLVQTYNQLFEENP INASGVDAKAIL SARLSKSRRENLI AQLPGEKKNGLFGN |
| Hypa-Cas9 | 181 | VDKLF IQLVQTYNQLFEENP INASGVDAKAIL SARLSKSRRENLI AQLPGEKKNGLFGN |
| xCas9-3.7 | 181 | VDKLF IQLVQTYNQLFEENP INASGVDAKAIL SARLSKSRRENLI AQLPGEKKNGLFGN |

|           |     |                                                            |
|-----------|-----|------------------------------------------------------------|
| Clone-1   | 241 | LIALSLGLTPNFKSNFDLAEDAKLQLSKDTYDDDLNLLAQIGDQYADFLAAKNLSDAI |
| Clone-2   | 241 | LIALSLGLTPNFKSNFDLAEDAKLQLSKDTYDDDLNLLAQIGDQYADFLAAKNLSDAI |
| Clone-3   | 241 | LIALSLGLTPNFKSNFDLAEDAKLQLSKDTYDDDLNLLAQIGDQYADFLAAKNLSDAI |
| WT-Cas9   | 241 | LIALSLGLTPNFKSNFDLAEDAKLQLSKDTYDDDLNLLAQIGDQYADFLAAKNLSDAI |
| eSpCas9   | 241 | LIALSLGLTPNFKSNFDLAEDAKLQLSKDTYDDDLNLLAQIGDQYADFLAAKNLSDAI |
| Cas9-HF1  | 241 | LIALSLGLTPNFKSNFDLAEDAKLQLSKDTYDDDLNLLAQIGDQYADFLAAKNLSDAI |
| evo-Cas9  | 241 | LIALSLGLTPNFKSNFDLAEDAKLQLSKDTYDDDLNLLAQIGDQYADFLAAKNLSDAI |
| Hypa-Cas9 | 241 | LIALSLGLTPNFKSNFDLAEDAKLQLSKDTYDDDLNLLAQIGDQYADFLAAKNLSDAI |
| xCas9-3.7 | 241 | LIALSLGLTPNFKSNFDLAEDAKLQLSKDTYDDDLNLLAQIGDQYADFLAAKNLSDAI |

|           |     |                                                              |
|-----------|-----|--------------------------------------------------------------|
| Clone-1   | 301 | LLSDILRVNTEITKAPLSASMIKRYDEHHQDLTLLKALVRQQLPEKYKEIFFDQSKNGYA |
| Clone-2   | 301 | LLSDILRVNTEITKAPLSASMIKRYDEHHQDLTLLKALVRQQLPEKYKEIFFDQSKNGYA |
| Clone-3   | 301 | LLSDILRVNTEITKAPLSASMIKRYDEHHQDLTLLKALVRQQLPEKYKEIFFDQSKNGYA |
| WT-Cas9   | 301 | LLSDILRVNTEITKAPLSASMIKRYDEHHQDLTLLKALVRQQLPEKYKEIFFDQSKNGYA |
| eSpCas9   | 301 | LLSDILRVNTEITKAPLSASMIKRYDEHHQDLTLLKALVRQQLPEKYKEIFFDQSKNGYA |
| Cas9-HF1  | 301 | LLSDILRVNTEITKAPLSASMIKRYDEHHQDLTLLKALVRQQLPEKYKEIFFDQSKNGYA |
| evo-Cas9  | 301 | LLSDILRVNTEITKAPLSASMIKRYDEHHQDLTLLKALVRQQLPEKYKEIFFDQSKNGYA |
| Hypa-Cas9 | 301 | LLSDILRVNTEITKAPLSASMIKRYDEHHQDLTLLKALVRQQLPEKYKEIFFDQSKNGYA |
| xCas9-3.7 | 301 | LLSDILRVNTEITKAPLSASMIKRYDEHHQDLTLLKALVRQQLPEKYKEIFFDQSKNGYA |

Clone-1 361 GYIDGGASQEEFYKFIKPILEKMDGTEELLVKNLNREDLLRKQRTFDNGSIPHQIHLGELH  
Clone-2 361 GYIDGGASQEEFYKFIKPILEKMDGTEELLVKNLNREDLLRKQRTFDNGSIPHQIHLGELH  
Clone-3 361 GYIDG[S]ASQEEFYKFIKPILEKMDGTEELLVKNLNREDLLRKQRTFDNGSIPHQIHLGELH  
WT-Cas9 361 GYIDGGASQEEFYKFIKPILEKMDGTEELLVKNLNREDLLRKQRTFDNGSIPHQIHLGELH  
eSpCas9 361 GYIDGGASQEEFYKFIKPILEKMDGTEELLVKNLNREDLLRKQRTFDNGSIPHQIHLGELH  
Cas9-HF1 361 GYIDGGASQEEFYKFIKPILEKMDGTEELLVKNLNREDLLRKQRTFDNGSIPHQIHLGELH  
evo-Cas9 361 GYIDGGASQEEFYKFIKPILEKMDGTEELLVKNLNREDLLRKQRTFDNGSIPHQIHLGELH  
Hypa-Cas9 361 GYIDGGASQEEFYKFIKPILEKMDGTEELLVKNLNREDLLRKQRTFDNGSIPHQIHLGELH  
xCas9-3.7 361 GYIDGGASQEEFYKFIKPILEKMDGTEELLVKNLNREDLLRKQRTFDNG[**I**]IPHQIHLGELH

Clone-1 421 AILRRQEDFYFPLKDNREKIEKILTFRIPYYVGPLARGNSRFAMWTRKSEETITPWNFEE  
Clone-2 421 AILRRQEDFYFPLKDNREKIEKILTFRIPYYVGPLARGNSRFAMWTRKSEETITPWNFEE  
Clone-3 421 AILRRQEDFYFPLKDNREKIEKILTFRIPYYVGPLARGNSRFAMWTRKSEETITPWNFEE  
WT-Cas9 421 AILRRQEDFYFPLKDNREKIEKILTFRIPYYVGPLARGNSRFAMWTRKSEETITPWNFEE  
eSpCas9 421 AILRRQEDFYFPLKDNREKIEKILTFRIPYYVGPLARGNSRFAMWTRKSEETITPWNFEE  
Cas9-HF1 421 AILRRQEDFYFPLKDNREKIEKILTFRIPYYVGPLARGNSRFAMWTRKSEETITPWNFEE  
evo-Cas9 421 AILRRQEDFYFPLKDNREKIEKILTFRIPYYVGPLARGNSRFAMWTRKSEETITPWNFEE  
Hypa-Cas9 421 AILRRQEDFYFPLKDNREKIEKILTFRIPYYVGPLARGNSRFAMWTRKSEETITPWNFEE  
xCas9-3.7 421 AILRRQEDFYFPLKDNREKIEKILTFRIPYYVGPLARGNSRFAMWTRKSEETITPWNFEE**K**

Clone-1 481 VVDKGASAQSFIERMTNFDKNLPNEKVLPKHSLLYEYFTVYNELTKVKYVTEGMRKPA**S**L  
Clone-2 481 VVDKGASAQSFIERMTNFDKNLPNEKVLPKHSLLYEYFTVYNELTKVKYVTEGMRKPAFL  
Clone-3 481 VVDKGASAQSFIERMTNFDKNLPNEKVLPKHSLLYEYFTVYNELTKVKYVTEGMRKPAFL  
WT-Cas9 481 VVDKGASAQSFIERMTNFDKNLPNEKVLPKHSLLYEYFTVYNELTKVKYVTEGMRKPAFL  
eSpCas9 481 VVDKGASAQSFIERMTNFDKNLPNEKVLPKHSLLYEYFTVYNELTKVKYVTEGMRKPAFL  
Cas9-HF1 481 VVDKGASAQSFIERMT**A**FDKNLPNEKVLPKHSLLYEYFTVYNELTKVKYVTEGMRKPAFL  
evo-Cas9 481 VVDKGASAQSFIER**V**TNFDKNLPNEKVLPKHSL**N**EYFTVYNELTK**E**KYVTEGMRKPAFL  
Hypa-Cas9 481 VVDKGASAQSFIERMTNFDKNLPNEKVLPKHSLLYEYFTVYNELTKVKYVTEGMRKPAFL  
xCas9-3.7 481 VVDKGASAQSFIERMTNFDKNLPNEKVLPKHSLLYEYFTVYNELTKVKYVTEGMRKPAFL

Clone-1 541 SGEQKKAIVDLLFKTNRKVTVKQLKEDYFKKIECFDSVEISGVEDRFNASLGTYHDLLKI  
Clone-2 541 SGEQKKAIVDLLFKTNRKVTVKQLKEDYFKKIECFDSVEISGVEDRFNASLGTYHDLLKI  
Clone-3 541 SGEQKKAIVDLLFKTNRKVTVKQLKEDYFKKIECFDSVEISGVEDRFNASLGTYHDLLKI  
WT-Cas9 541 SGEQKKAIVDLLFKTNRKVTVKQLKEDYFKKIECFDSVEISGVEDRFNASLGTYHDLLKI  
eSpCas9 541 SGEQKKAIVDLLFKTNRKVTVKQLKEDYFKKIECFDSVEISGVEDRFNASLGTYHDLLKI  
Cas9-HF1 541 SGEQKKAIVDLLFKTNRKVTVKQLKEDYFKKIECFDSVEISGVEDRFNASLGTYHDLLKI  
evo-Cas9 541 SGEQKKAIVDLLFKTNRKVTVKQLKEDYFKKIECFDSVEISGVEDRFNASLGTYHDLLKI  
Hypa-Cas9 541 SGEQKKAIVDLLFKTNRKVTVKQLKEDYFKKIECFDSVEISGVEDRFNASLGTYHDLLKI  
xCas9-3.7 541 **S**G**E**QKKAIVDLLFKTNRKVTVKQLKEDYFKKIECFDSVEISGVEDRFNASLGTYHDLLKI

Clone-1 601 IKDKDFLDNEENEDILEDIVLTLTLFEDREMIEERLKTYAHLFDDKVMKQLKRRRYTGWG  
Clone-2 601 **N**KDKDFLDNEENEDILEDIVLTLTLFEDREMIEERLKTYAHLFDDKVMKQLKRRRYTGWG  
Clone-3 601 IKDKDFLDNEENEDILEDIVLTLTLFEDREMIEERLKTYAHLFDDKVMKQLKRRRYTGWG  
WT-Cas9 601 IKDKDFLDNEENEDILEDIVLTLTLFEDREMIEERLKTYAHLFDDKVMKQLKRRRYTGWG  
eSpCas9 601 IKDKDFLDNEENEDILEDIVLTLTLFEDREMIEERLKTYAHLFDDKVMKQLKRRRYTGWG  
Cas9-HF1 601 IKDKDFLDNEENEDILEDIVLTLTLFEDREMIEERLKTYAHLFDDKVMKQLKRRRYTGWG  
evo-Cas9 601 IKDKDFLDNEENEDILEDIVLTLTLFEDREMIEERLKTYAHLFDDKVMKQLKRRRYTGWG  
Hypa-Cas9 601 IKDKDFLDNEENEDILEDIVLTLTLFEDREMIEERLKTYAHLFDDKVMKQLKRRRYTGWG  
xCas9-3.7 601 IKDKDFLDNEENEDILEDIVLTLTLFEDREMIEERLKTYAHLFDDKVMKQLKRRRYTGWG

Clone-1 661 RLSRKLINGIRDKQSGKTILDFLKSDFGANRNF**M**QLIHDDSLTFKEDIQKAQVSGQGDSL  
Clone-2 661 RLSRKLINGIRDKQSGKTILDFLKSDFGANRNF**M**QLIHDDSLTFKEDIQKAQVSGQGDSL  
Clone-3 661 RLSRKLINGIRDKQSGKTILDFLKSDFGANRNF**M**QLIHDDSLTFKEDIQKAQVSGQGDSL  
WT-Cas9 661 RLSRKLINGIRDKQSGKTILDFLKSDFGANRNF**M**QLIHDDSLTFKEDIQKAQVSGQGDSL  
eSpCas9 661 RLSRKLINGIRDKQSGKTILDFLKSDFGANRNF**M**QLIHDDSLTFKEDIQKAQVSGQGDSL  
Cas9-HF1 661 **A**LSRKLINGIRDKQSGKTILDFLKSDFGANRNF**A**L**I**QHDDSLTFKEDIQKAQVSGQGDSL  
evo-Cas9 661 **Q**LSRKLINGIRDKQSGKTILDFLKSDFGANRNF**M**QLIHDDSLTFKEDIQKAQVSGQGDSL  
Hypa-Cas9 661 RLSRKLINGIRDKQSGKTILDFLKSDFGANR**A****F****A****A****L****I**AHDDSLTFKEDIQKAQVSGQGDSL  
xCas9-3.7 661 RLSRKLINGIRDKQSGKTILDFLKSDFGANR**F****I**QLIHDDSLTFKEDIQKAQVSGQGDSL

Clone-1 721 HEHIANLAGSPAIAKKGILQTVKVVDELVKVMGRHKPENIVIEIARENQTTQKGQKNSRER  
Clone-2 721 HEHIANLAGSPAIAKKGILQTVKVVDELVKVMGRHKPENIVIEMARENQTTQKGQKNSRER  
Clone-3 721 HEHIANLAGSPAIAKKGILQTVKVVDELVKVMGRHKPENIVIEIARENQTTQKGQKNSRER  
WT-Cas9 721 HEHIANLAGSPAIAKKGILQTVKVVDELVKVMGRHKPENIVIEMARENQTTQKGQKNSRER  
eSpCas9 721 HEHIANLAGSPAIAKKGILQTVKVVDELVKVMGRHKPENIVIEMARENQTTQKGQKNSRER  
Cas9-HF1 721 HEHIANLAGSPAIAKKGILQTVKVVDELVKVMGRHKPENIVIEMARENQTTQKGQKNSRER  
evo-Cas9 721 HEHIANLAGSPAIAKKGILQTVKVVDELVKVMGRHKPENIVIEMARENQTTQKGQKNSRER  
Hypa-Cas9 721 HEHIANLAGSPAIAKKGILQTVKVVDELVKVMGRHKPENIVIEMARENQTTQKGQKNSRER  
xCas9-3.7 721 HEHIANLAGSPAIAKKGILQTVKVVDELVKVMGRHKPENIVIEMARENQTTQKGQKNSRER

Clone-1 781 MKRIEEGIKELGSQILKEHPVENTQLQNEKLYLYYLQNGRDMYVDQELDINRLSDYDVDH  
Clone-2 781 MKRIEEGIKELGSQILKEHPVENTQLQNEKLYLYYLQNGRDMYVDQELDINRLSDYDVDH  
Clone-3 781 MKRIEEGIKELGSQILKEHPVENTQLQNEKLYLYYLQNGRDMYVDQELDINRLSDYDVDH  
WT-Cas9 781 MKRIEEGIKELGSQILKEHPVENTQLQNEKLYLYYLQNGRDMYVDQELDINRLSDYDVDH  
eSpCas9 781 MKRIEEGIKELGSQILKEHPVENTQLQNEKLYLYYLQNGRDMYVDQELDINRLSDYDVDH  
Cas9-HF1 781 MKRIEEGIKELGSQILKEHPVENTQLQNEKLYLYYLQNGRDMYVDQELDINRLSDYDVDH  
evo-Cas9 781 MKRIEEGIKELGSQILKEHPVENTQLQNEKLYLYYLQNGRDMYVDQELDINRLSDYDVDH  
Hypa-Cas9 781 MKRIEEGIKELGSQILKEHPVENTQLQNEKLYLYYLQNGRDMYVDQELDINRLSDYDVDH  
xCas9-3.7 781 MKRIEEGIKELGSQILKEHPVENTQLQNEKLYLYYLQNGRDMYVDQELDINRLSDYDVDH

Clone-1 841 IVPQSFLKDDSIDNKVLRSDKNRGKSDNVPSEEVVKKMKNYWRQLLNANLITQRKFDNL  
Clone-2 841 IVPQSFLKDDSIDNKVLRSDKNRGKSDNVPSEEVVKKMKNYWRQLLNAKLITQRKFDNL  
Clone-3 841 IVPQSFLKDDSIDNKVLRSDKNRGKSDNVPSEEVVKKMKNYWRQLLNAKLITQRKFDNL  
WT-Cas9 841 IVPQSFLKDDSIDNKVLRSDKNRGKSDNVPSEEVVKKMKNYWRQLLNAKLITQRKFDNL  
eSpCas9 841 IVPQSFLKDDSIDNKVLRSDKNRGKSDNVPSEEVVKKMKNYWRQLLNAKLITQRKFDNL  
Cas9-HF1 841 IVPQSFLKDDSIDNKVLRSDKNRGKSDNVPSEEVVKKMKNYWRQLLNAKLITQRKFDNL  
evo-Cas9 841 IVPQSFLKDDSIDNKVLRSDKNRGKSDNVPSEEVVKKMKNYWRQLLNAKLITQRKFDNL  
Hypa-Cas9 841 IVPQSFLKDDSIDNKVLRSDKNRGKSDNVPSEEVVKKMKNYWRQLLNAKLITQRKFDNL  
xCas9-3.7 841 IVPQSFLKDDSIDNKVLRSDKNRGKSDNVPSEEVVKKMKNYWRQLLNAKLITQRKFDNL

Clone-1 901 TKAERGGLSELKAGFIKRQLVETRQITKHVAQILDSRMNTKYDENDKLIREVKVITLKS  
Clone-2 901 TKAERGGLSELKAGFIKRQLVETRQITKHVAQILDSRMNTKYDENDKLIREVKVITLKS  
Clone-3 901 TKAERGGLSELKAGFIKRQLVETRQITKHVAQILDSRMNTKYDENDKLIREVKVITLKS  
WT-Cas9 901 TKAERGGLSELKAGFIKRQLVETRQITKHVAQILDSRMNTKYDENDKLIREVKVITLKS  
eSpCas9 901 TKAERGGLSELKAGFIKRQLVETRQITKHVAQILDSRMNTKYDENDKLIREVKVITLKS  
Cas9-HF1 901 TKAERGGLSELKAGFIKRQLVETRAITKHVAQILDSRMNTKYDENDKLIREVKVITLKS  
evo-Cas9 901 TKAERGGLSELKAGFIKRQLVETRQITKHVAQILDSRMNTKYDENDKLIREVKVITLKS  
Hypa-Cas9 901 TKAERGGLSELKAGFIKRQLVETRQITKHVAQILDSRMNTKYDENDKLIREVKVITLKS  
xCas9-3.7 901 TKAERGGLSELKAGFIKRQLVETRQITKHVAQILDSRMNTKYDENDKLIREVKVITLKS

Clone-1 961 KLVSDFRKDFQFYKVREINNYHHAHDAYLNAVVGTAI IKKYPKLESEFVYGDYKVYDVRK  
Clone-2 961 KLVSDFRKDFQFYKVREINNYHHAHDAYLNAVVGTAI IKKYPKLESEFVYGDYKVYDVRK  
Clone-3 961 KLVSDFRKDFQFYKVREINNYHHAHDAYLNAVVGTAI IKKYPKLESEFVYGDYKVYDVRK  
WT-Cas9 961 KLVSDFRKDFQFYKVREINNYHHAHDAYLNAVVGTAI IKKYPKLESEFVYGDYKVYDVRK  
eSpCas9 961 KLVSDFRKDFQFYKVREINNYHHAHDAYLNAVVGTAI IKKYPKLESEFVYGDYKVYDVRK  
Cas9-HF1 961 KLVSDFRKDFQFYKVREINNYHHAHDAYLNAVVGTAI IKKYPKLESEFVYGDYKVYDVRK  
evo-Cas9 961 KLVSDFRKDFQFYKVREINNYHHAHDAYLNAVVGTAI IKKYPKLESEFVYGDYKVYDVRK  
Hypa-Cas9 961 KLVSDFRKDFQFYKVREINNYHHAHDAYLNAVVGTAI IKKYPKLESEFVYGDYKVYDVRK  
xCas9-3.7 961 KLVSDFRKDFQFYKVREINNYHHAHDAYLNAVVGTAI IKKYPKLESEFVYGDYKVYDVRK

Clone-1 1021 MIAKSEQEIGKATAKYFFYSNIMNFFKTEITLANGEIRKRPLIETNGETGEIVWDKGRDF  
Clone-2 1021 MIAKSEQEIGKATAKYFFYSNIMNFFKTEITLANGEIRKRPLIETNGETGEIVWDKGRDF  
Clone-3 1021 MIAKSEQEIGKATAKYFFYSNIMNFFKTEITLANGEIRKRPLIETNGETGEIVWDKGRDF  
WT-Cas9 1021 MIAKSEQEIGKATAKYFFYSNIMNFFKTEITLANGEIRKRPLIETNGETGEIVWDKGRDF  
eSpCas9 1021 MIAKSEQEIGKATAKYFFYSNIMNFFKTEITLANGEIRKAPLIETNGETGEIVWDKGRDF  
Cas9-HF1 1021 MIAKSEQEIGKATAKYFFYSNIMNFFKTEITLANGEIRKRPLIETNGETGEIVWDKGRDF  
evo-Cas9 1021 MIAKSEQEIGKATAKYFFYSNIMNFFKTEITLANGEIRKRPLIETNGETGEIVWDKGRDF  
Hypa-Cas9 1021 MIAKSEQEIGKATAKYFFYSNIMNFFKTEITLANGEIRKRPLIETNGETGEIVWDKGRDF  
xCas9-3.7 1021 MIAKSEQEIGKATAKYFFYSNIMNFFKTEITLANGEIRKRPLIETNGETGEIVWDKGRDF

Clone-1 1081 ATVRKVL SMPQVNIVKKTEVQTGGFSKESILPKRNSDKLIARKKDWDPKKYGGFDSPTVA  
Clone-2 1081 ATVRKVL SMPQVNIVKKTEVQTGGFSKESILPKRNSDKLIARKKDWDPKKYGGFDSPTVA  
Clone-3 1081 ATVRKVL SMPQVNIVKKTEVQTGGFSKESILPKRNSDKLIARKKDWDPKKYGGFDSPTVA  
WT-Cas9 1081 ATVRKVL SMPQVNIVKKTEVQTGGFSKESILPKRNSDKLIARKKDWDPKKYGGFDSPTVA  
eSpCas9 1081 ATVRKVL SMPQVNIVKKTEVQTGGFSKESILPKRNSDKLIARKKDWDPKKYGGFDSPTVA  
Cas9-HF1 1081 ATVRKVL SMPQVNIVKKTEVQTGGFSKESILPKRNSDKLIARKKDWDPKKYGGFDSPTVA  
evo-Cas9 1081 ATVRKVL SMPQVNIVKKTEVQTGGFSKESILPKRNSDKLIARKKDWDPKKYGGFDSPTVA  
Hypa-Cas9 1081 ATVRKVL SMPQVNIVKKTEVQTGGFSKESILPKRNSDKLIARKKDWDPKKYGGFDSPTVA  
xCas9-3.7 1081 ATVRKVL SMPQVNIVKKTEVQTGGFSKESILPKRNSDKLIARKKDWDPKKYGGFDSPTVA

Clone-1 1141 YSVLVVAKVEK GKSKKLKSVKELLGITIMERS SFEKNPIDFLEAKGYKEVKKDLIIKLPK  
Clone-2 1141 YSVLVVAKVEK GKSKKLKSVKELLGITIMERS SFEKNPIDFLEAKGYKEVKKDLIIKLPK  
Clone-3 1141 YSVLVVAKVEK GKSKKLKSVKELLGITIMERS SFEKNPIDFLEAKGYKEVKKDLIIKLPK  
WT-Cas9 1141 YSVLVVAKVEK GKSKKLKSVKELLGITIMERS SFEKNPIDFLEAKGYKEVKKDLIIKLPK  
eSpCas9 1141 YSVLVVAKVEK GKSKKLKSVKELLGITIMERS SFEKNPIDFLEAKGYKEVKKDLIIKLPK  
Cas9-HF1 1141 YSVLVVAKVEK GKSKKLKSVKELLGITIMERS SFEKNPIDFLEAKGYKEVKKDLIIKLPK  
evo-Cas9 1141 YSVLVVAKVEK GKSKKLKSVKELLGITIMERS SFEKNPIDFLEAKGYKEVKKDLIIKLPK  
Hypa-Cas9 1141 YSVLVVAKVEK GKSKKLKSVKELLGITIMERS SFEKNPIDFLEAKGYKEVKKDLIIKLPK  
xCas9-3.7 1141 YSVLVVAKVEK GKSKKLKSVKELLGITIMERS SFEKNPIDFLEAKGYKEVKKDLIIKLPK

Clone-1 1201 YSLFELENGRKRMLASAGELQKGNELALPSKYVNFLYLASHYEKLGKSPEDNEQKQLFVE  
Clone-2 1201 YSLFELENGRKRMLASAGELQKGNELALPSKYVNFLYLASHYEKLGKSPEDNEQKQLFVE  
Clone-3 1201 YSLFELENGRKRMLASAGELQKGNELALPSKYVNFLYLASHYEKLGKSPEDNEQKQLFVE  
WT-Cas9 1201 YSLFELENGRKRMLASAGELQKGNELALPSKYVNFLYLASHYEKLGKSPEDNEQKQLFVE  
eSpCas9 1201 YSLFELENGRKRMLASAGELQKGNELALPSKYVNFLYLASHYEKLGKSPEDNEQKQLFVE  
Cas9-HF1 1201 YSLFELENGRKRMLASAGELQKGNELALPSKYVNFLYLASHYEKLGKSPEDNEQKQLFVE  
evo-Cas9 1201 YSLFELENGRKRMLASAGELQKGNELALPSKYVNFLYLASHYEKLGKSPEDNEQKQLFVE  
Hypa-Cas9 1201 YSLFELENGRKRMLASAGELQKGNELALPSKYVNFLYLASHYEKLGKSPEDNEQKQLFVE  
xCas9-3.7 1201 YSLFELENGRKRMLASAGELQKGNELALPSKYVNFLYLASHYEKLGKSPEDNEQKQLFVE

Clone-1 1261 QHKHYLDEII EQISEFSKRVI LADANLDKVL SAYNKHRDKPIREQAENIIHLFTLTNLGA  
Clone-2 1261 QHKHYLDEII EQISEFSKRVI LADANLDKVL SAYNKHRDKPIREQAENIIHLFTLTNLGA  
Clone-3 1261 QHKHYLDEII EQISEFSKRVI LADANLDKVL SAYNKHRDKPIREQAENIIHLFTLTNLGA  
WT-Cas9 1261 QHKHYLDEII EQISEFSKRVI LADANLDKVL SAYNKHRDKPIREQAENIIHLFTLTNLGA  
eSpCas9 1261 QHKHYLDEII EQISEFSKRVI LADANLDKVL SAYNKHRDKPIREQAENIIHLFTLTNLGA  
Cas9-HF1 1261 QHKHYLDEII EQISEFSKRVI LADANLDKVL SAYNKHRDKPIREQAENIIHLFTLTNLGA  
evo-Cas9 1261 QHKHYLDEII EQISEFSKRVI LADANLDKVL SAYNKHRDKPIREQAENIIHLFTLTNLGA  
Hypa-Cas9 1261 QHKHYLDEII EQISEFSKRVI LADANLDKVL SAYNKHRDKPIREQAENIIHLFTLTNLGA  
xCas9-3.7 1261 QHKHYLDEII EQISEFSKRVI LADANLDKVL SAYNKHRDKPIREQAENIIHLFTLTNLGA

Clone-1 1321 PAAFKYFDTTIDRKRYTSTKEVLDATLIHQSI TGLYETRIDLSQLGGDGGSGPPKKKRKV  
Clone-2 1321 PAAFKYFDTTIDRKRYTSTKEVLDATLIHQSI TGLYETRIDLSQLGGDGGSGPPKKKRKV  
Clone-3 1321 PAAFKYFDTTIDRKRYTSTKEVLDATLIHQSI TGLYETRIDLSQLGGDGGSGPPKKKRKV  
WT-Cas9 1321 PAAFKYFDTTIDRKRYTSTKEVLDATLIHQSI TGLYETRIDLSQLGGDGGSGPPKKKRKV  
eSpCas9 1321 PAAFKYFDTTIDRKRYTSTKEVLDATLIHQSI TGLYETRIDLSQLGGDGGSGPPKKKRKV  
Cas9-HF1 1321 PAAFKYFDTTIDRKRYTSTKEVLDATLIHQSI TGLYETRIDLSQLGGDGGSGPPKKKRKV  
evo-Cas9 1321 PAAFKYFDTTIDRKRYTSTKEVLDATLIHQSI TGLYETRIDLSQLGGDGGSGPPKKKRKV  
Hypa-Cas9 1321 PAAFKYFDTTIDRKRYTSTKEVLDATLIHQSI TGLYETRIDLSQLGGDGGSGPPKKKRKV  
xCas9-3.7 1321 PAAFKYFDTTIDRKRYTSTKEVLDATLIHQSI TGLYETRIDLSQLGGDGGSGPPKKKRKV

Clone-1 1381 YPYDVPDYA  
Clone-2 1381 YPYDVPDYA  
Clone-3 1381 YPYDVPDYA  
WT-Cas9 1381 YPYDVPDYA  
eSpCas9 1381 YPYDVPDYA  
Cas9-HF1 1381 YPYDVPDYA  
evo-Cas9 1381 YPYDVPDYA  
Hypa-Cas9 1381 YPYDVPDYA  
xCas9-3.7 1381 YPYDVPDYA

## DNA sequence alignment of Cas9 variants used in this study

|           |   |                                                              |
|-----------|---|--------------------------------------------------------------|
| Clone-1   | 1 | ATGGACAAGAAGTACAGCATCGGCCTGGACATCGGTACCAACAGCGTGGGCTGGGCCGTG |
| Clone-2   | 1 | ATGGACAAGAAGTACAGCATCGGCCTGGACATCGGTACCAACAGCGTGGGCTGGGCCGTG |
| Clone-3   | 1 | ATGGACAAGAAGTACAGCATCGGCCTGGACATCGGTACCAACAGCGTGGGCTGGGCCGTG |
| WT-Cas9   | 1 | ATGGACAAGAAGTACAGCATCGGCCTGGACATCGGTACCAACAGCGTGGGCTGGGCCGTG |
| eSpCas9   | 1 | ATGGACAAGAAGTACAGCATCGGCCTGGACATCGGTACCAACAGCGTGGGCTGGGCCGTG |
| Cas9-HF1  | 1 | ATGGACAAGAAGTACAGCATCGGCCTGGACATCGGTACCAACAGCGTGGGCTGGGCCGTG |
| evo-Cas9  | 1 | ATGGACAAGAAGTACAGCATCGGCCTGGACATCGGTACCAACAGCGTGGGCTGGGCCGTG |
| Hypa-Cas9 | 1 | ATGGACAAGAAGTACAGCATCGGCCTGGACATCGGTACCAACAGCGTGGGCTGGGCCGTG |
| xCas9-3.7 | 1 | ATGGACAAGAAGTACAGCATCGGCCTGGACATCGGTACCAACAGCGTGGGCTGGGCCGTG |

|           |    |                                                             |
|-----------|----|-------------------------------------------------------------|
| Clone-1   | 61 | ATCACCGACGAGTACAAGGTGCCAGCAAGAAGTTCAAGGTGCTGGGCAACACCGACCGC |
| Clone-2   | 61 | ATCACCGACGAGTACAAGGTGCCAGCAAGAAGTTCAAGGTGCTGGGCAACACCGACCGC |
| Clone-3   | 61 | ATCACCGACGAGTACAAGGTGCCAGCAAGAAGTTCAAGGTGCTGGGCAACACCGACCGC |
| WT-Cas9   | 61 | ATCACCGACGAGTACAAGGTGCCAGCAAGAAGTTCAAGGTGCTGGGCAACACCGACCGC |
| eSpCas9   | 61 | ATCACCGACGAGTACAAGGTGCCAGCAAGAAGTTCAAGGTGCTGGGCAACACCGACCGC |
| Cas9-HF1  | 61 | ATCACCGACGAGTACAAGGTGCCAGCAAGAAGTTCAAGGTGCTGGGCAACACCGACCGC |
| evo-Cas9  | 61 | ATCACCGACGAGTACAAGGTGCCAGCAAGAAGTTCAAGGTGCTGGGCAACACCGACCGC |
| Hypa-Cas9 | 61 | ATCACCGACGAGTACAAGGTGCCAGCAAGAAGTTCAAGGTGCTGGGCAACACCGACCGC |
| xCas9-3.7 | 61 | ATCACCGACGAGTACAAGGTGCCAGCAAGAAGTTCAAGGTGCTGGGCAACACCGACCGC |

|           |     |                                                               |
|-----------|-----|---------------------------------------------------------------|
| Clone-1   | 121 | CACAGCATCAAGAAGAACCTGATCGGCGCCCTGCTGTTTCGACAGCGGCGAGACCGCCGAG |
| Clone-2   | 121 | CACAGCATCAAGAAGAACCTGATCGGCGCCCTGCTGTTTCGACAGCGGCGAGACCGCCGAG |
| Clone-3   | 121 | CACAGCATCAAGAAGAACCTGATCGGCGCCCTGCTGTTTCGACAGCGGCGAGACCGCCGAG |
| WT-Cas9   | 121 | CACAGCATCAAGAAGAACCTGATCGGCGCCCTGCTGTTTCGACAGCGGCGAGACCGCCGAG |
| eSpCas9   | 121 | CACAGCATCAAGAAGAACCTGATCGGCGCCCTGCTGTTTCGACAGCGGCGAGACCGCCGAG |
| Cas9-HF1  | 121 | CACAGCATCAAGAAGAACCTGATCGGCGCCCTGCTGTTTCGACAGCGGCGAGACCGCCGAG |
| evo-Cas9  | 121 | CACAGCATCAAGAAGAACCTGATCGGCGCCCTGCTGTTTCGACAGCGGCGAGACCGCCGAG |
| Hypa-Cas9 | 121 | CACAGCATCAAGAAGAACCTGATCGGCGCCCTGCTGTTTCGACAGCGGCGAGACCGCCGAG |
| xCas9-3.7 | 121 | CACAGCATCAAGAAGAACCTGATCGGCGCCCTGCTGTTTCGACAGCGGCGAGACCGCCGAG |

|           |     |                                                             |
|-----------|-----|-------------------------------------------------------------|
| Clone-1   | 181 | GCCACCCGCCTGAAGCGCACCGCCCGCCGCGCTACACCCGCCGCAAGAACCGCATCTGC |
| Clone-2   | 181 | GCCACCCGCCTGAAGCGCACCGCCCGCCGCGCTACACCCGCCGCAAGAACCGCATCTGC |
| Clone-3   | 181 | GCCACCCGCCTGAAGCGCACCGCCCGCCGCGCTACACCCGCCGCAAGAACCGCATCTGC |
| WT-Cas9   | 181 | GCCACCCGCCTGAAGCGCACCGCCCGCCGCGCTACACCCGCCGCAAGAACCGCATCTGC |
| eSpCas9   | 181 | GCCACCCGCCTGAAGCGCACCGCCCGCCGCGCTACACCCGCCGCAAGAACCGCATCTGC |
| Cas9-HF1  | 181 | GCCACCCGCCTGAAGCGCACCGCCCGCCGCGCTACACCCGCCGCAAGAACCGCATCTGC |
| evo-Cas9  | 181 | GCCACCCGCCTGAAGCGCACCGCCCGCCGCGCTACACCCGCCGCAAGAACCGCATCTGC |
| Hypa-Cas9 | 181 | GCCACCCGCCTGAAGCGCACCGCCCGCCGCGCTACACCCGCCGCAAGAACCGCATCTGC |
| xCas9-3.7 | 181 | GCCACCCGCCTGAAGCGCACCGCCCGCCGCGCTACACCCGCCGCAAGAACCGCATCTGC |

|           |     |                                                              |
|-----------|-----|--------------------------------------------------------------|
| Clone-1   | 241 | TACCTGCAGGAGATCTTCAGCAACGAGATGGCCAAGGTGGACGACAGCTTCTTCCACCGC |
| Clone-2   | 241 | TACCTGCAGGAGATCTTCAGCAACGAGATGGCCAAGGTGGACGACAGCTTCTTCCACCGC |
| Clone-3   | 241 | TACCTGCAGGAGATCTTCAGCAACGAGATGGCCAAGGTGGACGACAGCTTCTTCCACCGC |
| WT-Cas9   | 241 | TACCTGCAGGAGATCTTCAGCAACGAGATGGCCAAGGTGGACGACAGCTTCTTCCACCGC |
| eSpCas9   | 241 | TACCTGCAGGAGATCTTCAGCAACGAGATGGCCAAGGTGGACGACAGCTTCTTCCACCGC |
| Cas9-HF1  | 241 | TACCTGCAGGAGATCTTCAGCAACGAGATGGCCAAGGTGGACGACAGCTTCTTCCACCGC |
| evo-Cas9  | 241 | TACCTGCAGGAGATCTTCAGCAACGAGATGGCCAAGGTGGACGACAGCTTCTTCCACCGC |
| Hypa-Cas9 | 241 | TACCTGCAGGAGATCTTCAGCAACGAGATGGCCAAGGTGGACGACAGCTTCTTCCACCGC |
| xCas9-3.7 | 241 | TACCTGCAGGAGATCTTCAGCAACGAGATGGCCAAGGTGGACGACAGCTTCTTCCACCGC |

|           |     |                                                             |
|-----------|-----|-------------------------------------------------------------|
| Clone-1   | 301 | CTGGAGGAGAGCTTCTTGGTGGAGGAGGACAAGAAGCAGAGCGCCACCCCATCTTCGGC |
| Clone-2   | 301 | CTGGAGGAGAGCTTCTTGGTGGAGGAGGACAAGAAGCAGAGCGCCACCCCATCTTCGGC |
| Clone-3   | 301 | CTGGAGGAGAGCTTCTTGGTGGAGGAGGACAAGAAGCAGAGCGCCACCCCATCTTCGGC |
| WT-Cas9   | 301 | CTGGAGGAGAGCTTCTTGGTGGAGGAGGACAAGAAGCAGAGCGCCACCCCATCTTCGGC |
| eSpCas9   | 301 | CTGGAGGAGAGCTTCTTGGTGGAGGAGGACAAGAAGCAGAGCGCCACCCCATCTTCGGC |
| Cas9-HF1  | 301 | CTGGAGGAGAGCTTCTTGGTGGAGGAGGACAAGAAGCAGAGCGCCACCCCATCTTCGGC |
| evo-Cas9  | 301 | CTGGAGGAGAGCTTCTTGGTGGAGGAGGACAAGAAGCAGAGCGCCACCCCATCTTCGGC |
| Hypa-Cas9 | 301 | CTGGAGGAGAGCTTCTTGGTGGAGGAGGACAAGAAGCAGAGCGCCACCCCATCTTCGGC |
| xCas9-3.7 | 301 | CTGGAGGAGAGCTTCTTGGTGGAGGAGGACAAGAAGCAGAGCGCCACCCCATCTTCGGC |

Clone-1 361 AACATCGTGGACGAGGTGGCTACCACGAGAAGTACCCCACCATCTACCACCTGCGCAAG  
Clone-2 361 AACATCGTGGACGAGGTGGCTACCACGAGAAGTACCCCACCATCTACCACCTGCGCAAG  
Clone-3 361 AACATCGTGGACGAGGTGGCTACCACGAGAAGTACCCCACCATCTACCACCTGCGCAAG  
WT-Cas9 361 AACATCGTGGACGAGGTGGCTACCACGAGAAGTACCCCACCATCTACCACCTGCGCAAG  
eSpCas9 361 AACATCGTGGACGAGGTGGCTACCACGAGAAGTACCCCACCATCTACCACCTGCGCAAG  
Cas9-HF1 361 AACATCGTGGACGAGGTGGCTACCACGAGAAGTACCCCACCATCTACCACCTGCGCAAG  
evo-Cas9 361 AACATCGTGGACGAGGTGGCTACCACGAGAAGTACCCCACCATCTACCACCTGCGCAAG  
Hypa-Cas9 361 AACATCGTGGACGAGGTGGCTACCACGAGAAGTACCCCACCATCTACCACCTGCGCAAG  
xCas9-3.7 361 AACATCGTGGACGAGGTGGCTACCACGAGAAGTACCCCACCATCTACCACCTGCGCAAG

Clone-1 421 AAGCTGGTGGACAGCACCGACAAGGCCGACCTGCGCCTGATCTACCTGGCCCTGGCCAC  
Clone-2 421 AAGCTGGTGGACAGCACCGACAAGGCCGACCTGCGCCTGATCTACCTGGCCCTGGCCAC  
Clone-3 421 AAGCTGGTGGACAGCACCTGACAAGGCCGACCTGCGCCTGATCTACCTGGCCCTGGCCAC  
WT-Cas9 421 AAGCTGGTGGACAGCACCGACAAGGCCGACCTGCGCCTGATCTACCTGGCCCTGGCCAC  
eSpCas9 421 AAGCTGGTGGACAGCACCGACAAGGCCGACCTGCGCCTGATCTACCTGGCCCTGGCCAC  
Cas9-HF1 421 AAGCTGGTGGACAGCACCGACAAGGCCGACCTGCGCCTGATCTACCTGGCCCTGGCCAC  
evo-Cas9 421 AAGCTGGTGGACAGCACCGACAAGGCCGACCTGCGCCTGATCTACCTGGCCCTGGCCAC  
Hypa-Cas9 421 AAGCTGGTGGACAGCACCGACAAGGCCGACCTGCGCCTGATCTACCTGGCCCTGGCCAC  
xCas9-3.7 421 AAGCTGGTGGACAGCACCGACAAGGCCGACCTGCGCCTGATCTACCTGGCCCTGGCCAC

Clone-1 481 ATGATCAAGTTCCGCGGCCACTTCCTGATCGAGGGCGACCTGAACCCCGACAACAGCGAC  
Clone-2 481 ATGATCAAGTTCCGCGGCCACTTCCTGATCGAGGGCGACCTGAACCCCGACAACAGCGAC  
Clone-3 481 ATGATCAAGTTCCGCGGCCACTTCCTGATCGAGGGCGACCTGAACCCCGACAACAGCGAC  
WT-Cas9 481 ATGATCAAGTTCCGCGGCCACTTCCTGATCGAGGGCGACCTGAACCCCGACAACAGCGAC  
eSpCas9 481 ATGATCAAGTTCCGCGGCCACTTCCTGATCGAGGGCGACCTGAACCCCGACAACAGCGAC  
Cas9-HF1 481 ATGATCAAGTTCCGCGGCCACTTCCTGATCGAGGGCGACCTGAACCCCGACAACAGCGAC  
evo-Cas9 481 ATGATCAAGTTCCGCGGCCACTTCCTGATCGAGGGCGACCTGAACCCCGACAACAGCGAC  
Hypa-Cas9 481 ATGATCAAGTTCCGCGGCCACTTCCTGATCGAGGGCGACCTGAACCCCGACAACAGCGAC  
xCas9-3.7 481 ATGATCAAGTTCCGCGGCCACTTCCTGATCGAGGGCGACCTGAACCCCGACAACAGCGAC

Clone-1 541 GTGGACAAGCTGTTTCATCCAGCTGGTGCAGACCTACAACCAGCTGTTTCGAGGAGAACCCC  
Clone-2 541 GTGGACAAGCTGTTTCATCCAGCTGGTGCAGACCTACAACCAGCTGTTTCGAGGAGAACCCC  
Clone-3 541 GTGGACAAGCTGTTTCATCCAGCTGGTGCAGACCTACAACCAGCTGTTTCGAGGAGAACCCC  
WT-Cas9 541 GTGGACAAGCTGTTTCATCCAGCTGGTGCAGACCTACAACCAGCTGTTTCGAGGAGAACCCC  
eSpCas9 541 GTGGACAAGCTGTTTCATCCAGCTGGTGCAGACCTACAACCAGCTGTTTCGAGGAGAACCCC  
Cas9-HF1 541 GTGGACAAGCTGTTTCATCCAGCTGGTGCAGACCTACAACCAGCTGTTTCGAGGAGAACCCC  
evo-Cas9 541 GTGGACAAGCTGTTTCATCCAGCTGGTGCAGACCTACAACCAGCTGTTTCGAGGAGAACCCC  
Hypa-Cas9 541 GTGGACAAGCTGTTTCATCCAGCTGGTGCAGACCTACAACCAGCTGTTTCGAGGAGAACCCC  
xCas9-3.7 541 GTGGACAAGCTGTTTCATCCAGCTGGTGCAGACCTACAACCAGCTGTTTCGAGGAGAACCCC

Clone-1 601 ATCAACGCCAGCGGCGTGGACGCCAAGGCCATCCTGAGCGCCCGCCTGAGCAAGAGCCGC  
Clone-2 601 ATCAACGCCAGCGGCGTGGACGCCAAGGCCATCCTGAGCGCCCGCCTGAGCAAGAGCCGC  
Clone-3 601 ATCAACGCCAGCGGCGTGGACGCCAAGGCCATCCTGAGCGCCCGCCTGAGCAAGAGCCGC  
WT-Cas9 601 ATCAACGCCAGCGGCGTGGACGCCAAGGCCATCCTGAGCGCCCGCCTGAGCAAGAGCCGC  
eSpCas9 601 ATCAACGCCAGCGGCGTGGACGCCAAGGCCATCCTGAGCGCCCGCCTGAGCAAGAGCCGC  
Cas9-HF1 601 ATCAACGCCAGCGGCGTGGACGCCAAGGCCATCCTGAGCGCCCGCCTGAGCAAGAGCCGC  
evo-Cas9 601 ATCAACGCCAGCGGCGTGGACGCCAAGGCCATCCTGAGCGCCCGCCTGAGCAAGAGCCGC  
Hypa-Cas9 601 ATCAACGCCAGCGGCGTGGACGCCAAGGCCATCCTGAGCGCCCGCCTGAGCAAGAGCCGC  
xCas9-3.7 601 ATCAACGCCAGCGGCGTGGACGCCAAGGCCATCCTGAGCGCCCGCCTGAGCAAGAGCCGC

Clone-1 661 CGCCTGGAGAACCTGATCGCCCAGCTGCCC GGCGAGAAGAAGAACGGCCTGTTTCGGCAAC  
Clone-2 661 CGCCTGGAGAACCTGATCGCCCAGCTGCCC GGCGAGAAGAAGAACGGCCTGTTTCGGCAAC  
Clone-3 661 CGCCTGGAGAACCTGATCGCCCAGCTGCCC GGCGAGAAGAAGAACGGCCTGTTTCGGCAAC  
WT-Cas9 661 CGCCTGGAGAACCTGATCGCCCAGCTGCCC GGCGAGAAGAAGAACGGCCTGTTTCGGCAAC  
eSpCas9 661 CGCCTGGAGAACCTGATCGCCCAGCTGCCC GGCGAGAAGAAGAACGGCCTGTTTCGGCAAC  
Cas9-HF1 661 CGCCTGGAGAACCTGATCGCCCAGCTGCCC GGCGAGAAGAAGAACGGCCTGTTTCGGCAAC  
evo-Cas9 661 CGCCTGGAGAACCTGATCGCCCAGCTGCCC GGCGAGAAGAAGAACGGCCTGTTTCGGCAAC  
Hypa-Cas9 661 CGCCTGGAGAACCTGATCGCCCAGCTGCCC GGCGAGAAGAAGAACGGCCTGTTTCGGCAAC  
xCas9-3.7 661 CGCCTGGAGAACCTGATCGCCCAGCTGCCC GGCGAGAAGAAGAACGGCCTGTTTCGGCAAC

Clone-1 721 CTGATCGCCCTGAGCCTGGGCCTGACCCCCAACTTCAAGAGCAACTTCGACCTGGCCGAG  
Clone-2 721 CTGATCGCCCTGAGCCTGGGCCTGACCCCCAACTTCAAGAGCAACTTCGACCTGGCCGAG  
Clone-3 721 CTGATCGCCCTGAGCCTGGGCCTGACCCCCAACTTCAAGAGCAACTTCGACCTGGCCGAG  
WT-Cas9 721 CTGATCGCCCTGAGCCTGGGCCTGACCCCCAACTTCAAGAGCAACTTCGACCTGGCCGAG  
eSpCas9 721 CTGATCGCCCTGAGCCTGGGCCTGACCCCCAACTTCAAGAGCAACTTCGACCTGGCCGAG  
Cas9-HF1 721 CTGATCGCCCTGAGCCTGGGCCTGACCCCCAACTTCAAGAGCAACTTCGACCTGGCCGAG  
evo-Cas9 721 CTGATCGCCCTGAGCCTGGGCCTGACCCCCAACTTCAAGAGCAACTTCGACCTGGCCGAG  
Hypa-Cas9 721 CTGATCGCCCTGAGCCTGGGCCTGACCCCCAACTTCAAGAGCAACTTCGACCTGGCCGAG  
xCas9-3.7 721 CTGATCGCCCTGAGCCTGGGCCTGACCCCCAACTTCAAGAGCAACTTCGACCTGGCCGAG

Clone-1 781 GACGCCAAGCTGCAGCTGAGCAAGGACACCTACGACGACGACCTGGACAACCTGCTGGCC  
Clone-2 781 GACGCCAAGCTGCAGCTGAGCAAGGACACCTACGACGACGACCTGGACAACCTGCTGGCC  
Clone-3 781 GACGCCAAGCTGCAGCTGAGCAAGGACACCTACGACGACGACCTGGACAACCTGCTGGCC  
WT-Cas9 781 GACGCCAAGCTGCAGCTGAGCAAGGACACCTACGACGACGACCTGGACAACCTGCTGGCC  
eSpCas9 781 GACGCCAAGCTGCAGCTGAGCAAGGACACCTACGACGACGACCTGGACAACCTGCTGGCC  
Cas9-HF1 781 GACGCCAAGCTGCAGCTGAGCAAGGACACCTACGACGACGACCTGGACAACCTGCTGGCC  
evo-Cas9 781 GACGCCAAGCTGCAGCTGAGCAAGGACACCTACGACGACGACCTGGACAACCTGCTGGCC  
Hypa-Cas9 781 GACGCCAAGCTGCAGCTGAGCAAGGACACCTACGACGACGACCTGGACAACCTGCTGGCC  
xCas9-3.7 781 GACGCCAAGCTGCAGCTGAGCAAGGACACCTACGACGACGACCTGGACAACCTGCTGGCC

Clone-1 841 CAGATCGGCGACCAGTACGCCGACCTGTTCTTGGCCGCAAGAACCTGAGCGACGCCATC  
Clone-2 841 CAGATCGGCGACCAGTACGCCGACCTGTTCTTGGCCGCAAGAACCTGAGCGACGCCATC  
Clone-3 841 CAGATCGGCGACCAGTACGCCGACCTGTTCTTGGCCGCAAGAACCTGAGCGACGCCATC  
WT-Cas9 841 CAGATCGGCGACCAGTACGCCGACCTGTTCTTGGCCGCAAGAACCTGAGCGACGCCATC  
eSpCas9 841 CAGATCGGCGACCAGTACGCCGACCTGTTCTTGGCCGCAAGAACCTGAGCGACGCCATC  
Cas9-HF1 841 CAGATCGGCGACCAGTACGCCGACCTGTTCTTGGCCGCAAGAACCTGAGCGACGCCATC  
evo-Cas9 841 CAGATCGGCGACCAGTACGCCGACCTGTTCTTGGCCGCAAGAACCTGAGCGACGCCATC  
Hypa-Cas9 841 CAGATCGGCGACCAGTACGCCGACCTGTTCTTGGCCGCAAGAACCTGAGCGACGCCATC  
xCas9-3.7 841 CAGATCGGCGACCAGTACGCCGACCTGTTCTTGGCCGCAAGAACCTGAGCGACGCCATC

Clone-1 901 CTGCTGAGCGACATCCTGCGCGTGAACACCGAGATCACCAAGGCCCCCTGAGCGCCAGC  
Clone-2 901 CTGCTGAGCGACATCCTGCGCGTGAACACCGAGATCACCAAGGCCCCCTGAGCGCCAGC  
Clone-3 901 CTGCTGAGCGACATCCTGCGCGTGAACACCGAGATCACCAAGGCCCCCTGAGCGCCAGC  
WT-Cas9 901 CTGCTGAGCGACATCCTGCGCGTGAACACCGAGATCACCAAGGCCCCCTGAGCGCCAGC  
eSpCas9 901 CTGCTGAGCGACATCCTGCGCGTGAACACCGAGATCACCAAGGCCCCCTGAGCGCCAGC  
Cas9-HF1 901 CTGCTGAGCGACATCCTGCGCGTGAACACCGAGATCACCAAGGCCCCCTGAGCGCCAGC  
evo-Cas9 901 CTGCTGAGCGACATCCTGCGCGTGAACACCGAGATCACCAAGGCCCCCTGAGCGCCAGC  
Hypa-Cas9 901 CTGCTGAGCGACATCCTGCGCGTGAACACCGAGATCACCAAGGCCCCCTGAGCGCCAGC  
xCas9-3.7 901 CTGCTGAGCGACATCCTGCGCGTGAACACCGAGATCACCAAGGCCCCCTGAGCGCCAGC

Clone-1 961 ATGATCAAGCGCTACGACGAGCACCACCAGGACCTGACCCTGCTGAAGGCCCTGGTGCGC  
Clone-2 961 ATGATCAAGCGCTACGACGAGCACCACCAGGACCTGACCCTGCTGAAGGCCCTGGTGCGC  
Clone-3 961 ATGATCAAGCGCTACGACGAGCACCACCAGGACCTGACCCTGCTGAAGGCCCTGGTGCGC  
WT-Cas9 961 ATGATCAAGCGCTACGACGAGCACCACCAGGACCTGACCCTGCTGAAGGCCCTGGTGCGC  
eSpCas9 961 ATGATCAAGCGCTACGACGAGCACCACCAGGACCTGACCCTGCTGAAGGCCCTGGTGCGC  
Cas9-HF1 961 ATGATCAAGCGCTACGACGAGCACCACCAGGACCTGACCCTGCTGAAGGCCCTGGTGCGC  
evo-Cas9 961 ATGATCAAGCGCTACGACGAGCACCACCAGGACCTGACCCTGCTGAAGGCCCTGGTGCGC  
Hypa-Cas9 961 ATGATCAAGCGCTACGACGAGCACCACCAGGACCTGACCCTGCTGAAGGCCCTGGTGCGC  
xCas9-3.7 961 ATGATCAAGCTGCTACGACGAGCACCACCAGGACCTGACCCTGCTGAAGGCCCTGGTGCGC

Clone-1 1021 CAGCAGCTGCCCCGAGAAGTACAAGGAGATCTTCTTCGACCAGAGCAAGAACGGCTACGCC  
Clone-2 1021 CAGCAGCTGCCCCGAGAAGTACAAGGAGATCTTCTTCGACCAGAGCAAGAACGGCTACGCC  
Clone-3 1021 CAGCAGCTGCCCCGAGAAGTACAAGGAGATCTTCTTCGACCAGAGCAAGAACGGCTACGCC  
WT-Cas9 1021 CAGCAGCTGCCCCGAGAAGTACAAGGAGATCTTCTTCGACCAGAGCAAGAACGGCTACGCC  
eSpCas9 1021 CAGCAGCTGCCCCGAGAAGTACAAGGAGATCTTCTTCGACCAGAGCAAGAACGGCTACGCC  
Cas9-HF1 1021 CAGCAGCTGCCCCGAGAAGTACAAGGAGATCTTCTTCGACCAGAGCAAGAACGGCTACGCC  
evo-Cas9 1021 CAGCAGCTGCCCCGAGAAGTACAAGGAGATCTTCTTCGACCAGAGCAAGAACGGCTACGCC  
Hypa-Cas9 1021 CAGCAGCTGCCCCGAGAAGTACAAGGAGATCTTCTTCGACCAGAGCAAGAACGGCTACGCC  
xCas9-3.7 1021 CAGCAGCTGCCCCGAGAAGTACAAGGAGATCTTCTTCGACCAGAGCAAGAACGGCTACGCC

Clone-1 1081 GGCTACATCGACGGCGGCCAGCCAGGAGGAGTTCTACAAGTTCATCAAGCCCATCCTG  
Clone-2 1081 GGCTACATCGACGGCGGCCAGCCAGGAGGAGTTCTACAAGTTCATCAAGCCCATCCTG  
Clone-3 1081 GGCTACATCGACGGCAAGCGCCAGCCAGGAGGAGTTCTACAAGTTCATCAAGCCCATCCTG  
WT-Cas9 1081 GGCTACATCGACGGCGGCCAGCCAGGAGGAGTTCTACAAGTTCATCAAGCCCATCCTG  
eSpCas9 1081 GGCTACATCGACGGCGGCCAGCCAGGAGGAGTTCTACAAGTTCATCAAGCCCATCCTG  
Cas9-HF1 1081 GGCTACATCGACGGCGGCCAGCCAGGAGGAGTTCTACAAGTTCATCAAGCCCATCCTG  
evo-Cas9 1081 GGCTACATCGACGGCGGCCAGCCAGGAGGAGTTCTACAAGTTCATCAAGCCCATCCTG  
Hypa-Cas9 1081 GGCTACATCGACGGCGGCCAGCCAGGAGGAGTTCTACAAGTTCATCAAGCCCATCCTG  
xCas9-3.7 1081 GGCTACATCGACGGCGGCCAGCCAGGAGGAGTTCTACAAGTTCATCAAGCCCATCCTG

Clone-1 1141 GAGAAGATGGACGGCACCAGGAGGAGCTGCTGGTGAAGCTGAACCGCGAGGACCTGCTGCGC  
Clone-2 1141 GAGAAGATGGACGGCACCAGGAGGAGCTGCTGGTGAAGCTGAACCGCGAGGACCTGCTGCGC  
Clone-3 1141 GAGAAGATGGACGGCACCAGGAGGAGCTGCTGGTGAAGCTGAACCGCGAGGACCTGCTGCGC  
WT-Cas9 1141 GAGAAGATGGACGGCACCAGGAGGAGCTGCTGGTGAAGCTGAACCGCGAGGACCTGCTGCGC  
eSpCas9 1141 GAGAAGATGGACGGCACCAGGAGGAGCTGCTGGTGAAGCTGAACCGCGAGGACCTGCTGCGC  
Cas9-HF1 1141 GAGAAGATGGACGGCACCAGGAGGAGCTGCTGGTGAAGCTGAACCGCGAGGACCTGCTGCGC  
evo-Cas9 1141 GAGAAGATGGACGGCACCAGGAGGAGCTGCTGGTGAAGCTGAACCGCGAGGACCTGCTGCGC  
Hypa-Cas9 1141 GAGAAGATGGACGGCACCAGGAGGAGCTGCTGGTGAAGCTGAACCGCGAGGACCTGCTGCGC  
xCas9-3.7 1141 GAGAAGATGGACGGCACCAGGAGGAGCTGCTGGTGAAGCTGAACCGCGAGGACCTGCTGCGC

Clone-1 1201 AAGCAGCGCACCTTCGACAACGGCAGCATCCCCACCAGATCCACCTGGGCGAGCTGCAC  
Clone-2 1201 AAGCAGCGCACCTTCGACAACGGCAGCATCCCCACCAGATCCACCTGGGCGAGCTGCAC  
Clone-3 1201 AAGCAGCGCACCTTCGACAACGGCAGCATCCCCACCAGATCCACCTGGGCGAGCTGCAC  
WT-Cas9 1201 AAGCAGCGCACCTTCGACAACGGCAGCATCCCCACCAGATCCACCTGGGCGAGCTGCAC  
eSpCas9 1201 AAGCAGCGCACCTTCGACAACGGCAGCATCCCCACCAGATCCACCTGGGCGAGCTGCAC  
Cas9-HF1 1201 AAGCAGCGCACCTTCGACAACGGCAGCATCCCCACCAGATCCACCTGGGCGAGCTGCAC  
evo-Cas9 1201 AAGCAGCGCACCTTCGACAACGGCAGCATCCCCACCAGATCCACCTGGGCGAGCTGCAC  
Hypa-Cas9 1201 AAGCAGCGCACCTTCGACAACGGCAGCATCCCCACCAGATCCACCTGGGCGAGCTGCAC  
xCas9-3.7 1201 AAGCAGCGCACCTTCGACAACGGCATTCATCCCCACCAGATCCACCTGGGCGAGCTGCAC

Clone-1 1261 GCCATCCTGCGCCGCCAGGAGGACTTCTACCCCTTCTGAAGGACAACCGCGAGAAGATC  
Clone-2 1261 GCCATCCTGCGCCGCCAGGAGGACTTCTACCCCTTCTGAAGGACAACCGCGAGAAGATC  
Clone-3 1261 GCCATCCTGCGCCGCCAGGAGGACTTCTACCCCTTCTGAAGGACAACCGCGAGAAGATC  
WT-Cas9 1261 GCCATCCTGCGCCGCCAGGAGGACTTCTACCCCTTCTGAAGGACAACCGCGAGAAGATC  
eSpCas9 1261 GCCATCCTGCGCCGCCAGGAGGACTTCTACCCCTTCTGAAGGACAACCGCGAGAAGATC  
Cas9-HF1 1261 GCCATCCTGCGCCGCCAGGAGGACTTCTACCCCTTCTGAAGGACAACCGCGAGAAGATC  
evo-Cas9 1261 GCCATCCTGCGCCGCCAGGAGGACTTCTACCCCTTCTGAAGGACAACCGCGAGAAGATC  
Hypa-Cas9 1261 GCCATCCTGCGCCGCCAGGAGGACTTCTACCCCTTCTGAAGGACAACCGCGAGAAGATC  
xCas9-3.7 1261 GCCATCCTGCGCCGCCAGGAGGACTTCTACCCCTTCTGAAGGACAACCGCGAGAAGATC

Clone-1 1321 GAGAAGATCCTGACCTTCCGCATCCCCTACTACGTGGGCCCCCTGGCCCCGCGCAACAGC  
Clone-2 1321 GAGAAGATCCTGACCTTCCGCATCCCCTACTACGTGGGCCCCCTGGCCCCGCGCAACAGC  
Clone-3 1321 GAGAAGATCCTGACCTTCCGCATCCCCTACTACGTGGGCCCCCTGGCCCCGCGCAACAGC  
WT-Cas9 1321 GAGAAGATCCTGACCTTCCGCATCCCCTACTACGTGGGCCCCCTGGCCCCGCGCAACAGC  
eSpCas9 1321 GAGAAGATCCTGACCTTCCGCATCCCCTACTACGTGGGCCCCCTGGCCCCGCGCAACAGC  
Cas9-HF1 1321 GAGAAGATCCTGACCTTCCGCATCCCCTACTACGTGGGCCCCCTGGCCCCGCGCAACAGC  
evo-Cas9 1321 GAGAAGATCCTGACCTTCCGCATCCCCTACTACGTGGGCCCCCTGGCCCCGCGCAACAGC  
Hypa-Cas9 1321 GAGAAGATCCTGACCTTCCGCATCCCCTACTACGTGGGCCCCCTGGCCCCGCGCAACAGC  
xCas9-3.7 1321 GAGAAGATCCTGACCTTCCGCATCCCCTACTACGTGGGCCCCCTGGCCCCGCGCAACAGC

Clone-1 1381 CGCTTCGCCTGGATGACCCGCAAGAGCGAGGAGACCATCACCCCTGGAACCTTCGAGGAG  
Clone-2 1381 CGCTTCGCCTGGATGACCCGCAAGAGCGAGGAGACCATCACCCCTGGAACCTTCGAGGAG  
Clone-3 1381 CGCTTCGCCTGGATGACCCGCAAGAGCGAGGAGACCATCACCCCTGGAACCTTCGAGGAG  
WT-Cas9 1381 CGCTTCGCCTGGATGACCCGCAAGAGCGAGGAGACCATCACCCCTGGAACCTTCGAGGAG  
eSpCas9 1381 CGCTTCGCCTGGATGACCCGCAAGAGCGAGGAGACCATCACCCCTGGAACCTTCGAGGAG  
Cas9-HF1 1381 CGCTTCGCCTGGATGACCCGCAAGAGCGAGGAGACCATCACCCCTGGAACCTTCGAGGAG  
evo-Cas9 1381 CGCTTCGCCTGGATGACCCGCAAGAGCGAGGAGACCATCACCCCTGGAACCTTCGAGGAG  
Hypa-Cas9 1381 CGCTTCGCCTGGATGACCCGCAAGAGCGAGGAGACCATCACCCCTGGAACCTTCGAGGAG  
xCas9-3.7 1381 CGCTTCGCCTGGATGACCCGCAAGAGCGAGGAGACCATCACCCCTGGAACCTTCGAGGAG



Clone-1 1441 GTGGTGGACAAGGGCGCCAGCGCCCAGAGCTTCATCGAGCGCATGACCAACTTCGACAAG  
Clone-2 1441 GTGGTGGACAAGGGCGCCAGCGCCCAGAGCTTCATCGAGCGCATGACCAACTTCGACAAG  
Clone-3 1441 GTGGTGGACAAGGGCGCCAGCGCCCAGAGCTTCATCGAGCGCATGACCAACTTCGACAAG  
WT-Cas9 1441 GTGGTGGACAAGGGCGCCAGCGCCCAGAGCTTCATCGAGCGCATGACCAACTTCGACAAG  
eSpCas9 1441 GTGGTGGACAAGGGCGCCAGCGCCCAGAGCTTCATCGAGCGCATGACCAACTTCGACAAG  
Cas9-HF1 1441 GTGGTGGACAAGGGCGCCAGCGCCCAGAGCTTCATCGAGCGCATGACCAACTTCGACAAG  
evo-Cas9 1441 GTGGTGGACAAGGGCGCCAGCGCCCAGAGCTTCATCGAGCGCATGACCAACTTCGACAAG  
Hypa-Cas9 1441 GTGGTGGACAAGGGCGCCAGCGCCCAGAGCTTCATCGAGCGCATGACCAACTTCGACAAG  
xCas9-3.7 1441 GTGGTGGACAAGGGCGCCAGCGCCCAGAGCTTCATCGAGCGCATGACCAACTTCGACAAG

Clone-1 1501 AACCTGCCCCAACGAGAAGGTGCTGCCCAAGCACAGCCTGCTGTACGAGTACTTCACCGTG  
Clone-2 1501 AACCTGCCCCAACGAGAAGGTGCTGCCCAAGCACAGCCTGCTGTACGAGTACTTCACCGTG  
Clone-3 1501 AACCTGCCCCAACGAGAAGGTGCTGCCCAAGCACAGCCTGCTGTACGAGTACTTCACCGTG  
WT-Cas9 1501 AACCTGCCCCAACGAGAAGGTGCTGCCCAAGCACAGCCTGCTGTACGAGTACTTCACCGTG  
eSpCas9 1501 AACCTGCCCCAACGAGAAGGTGCTGCCCAAGCACAGCCTGCTGTACGAGTACTTCACCGTG  
Cas9-HF1 1501 AACCTGCCCCAACGAGAAGGTGCTGCCCAAGCACAGCCTGCTGTACGAGTACTTCACCGTG  
evo-Cas9 1501 AACCTGCCCCAACGAGAAGGTGCTGCCCAAGCACAGCCTGCTGTACGAGTACTTCACCGTG  
Hypa-Cas9 1501 AACCTGCCCCAACGAGAAGGTGCTGCCCAAGCACAGCCTGCTGTACGAGTACTTCACCGTG  
xCas9-3.7 1501 AACCTGCCCCAACGAGAAGGTGCTGCCCAAGCACAGCCTGCTGTACGAGTACTTCACCGTG

Clone-1 1561 TACAACGAGCTGACCAAGGTGAAGTACGTGACCGAGGGCATGCGCAAGCCCGCCTTCCTG  
Clone-2 1561 TACAACGAGCTGACCAAGGTGAAGTACGTGACCGAGGGCATGCGCAAGCCCGCCTTCCTG  
Clone-3 1561 TACAACGAGCTGACCAAGGTGAAGTACGTGACCGAGGGCATGCGCAAGCCCGCCTTCCTG  
WT-Cas9 1561 TACAACGAGCTGACCAAGGTGAAGTACGTGACCGAGGGCATGCGCAAGCCCGCCTTCCTG  
eSpCas9 1561 TACAACGAGCTGACCAAGGTGAAGTACGTGACCGAGGGCATGCGCAAGCCCGCCTTCCTG  
Cas9-HF1 1561 TACAACGAGCTGACCAAGGTGAAGTACGTGACCGAGGGCATGCGCAAGCCCGCCTTCCTG  
evo-Cas9 1561 TACAACGAGCTGACCAAGGTGAAGTACGTGACCGAGGGCATGCGCAAGCCCGCCTTCCTG  
Hypa-Cas9 1561 TACAACGAGCTGACCAAGGTGAAGTACGTGACCGAGGGCATGCGCAAGCCCGCCTTCCTG  
xCas9-3.7 1561 TACAACGAGCTGACCAAGGTGAAGTACGTGACCGAGGGCATGCGCAAGCCCGCCTTCCTG

Clone-1 1621 AGCGGCGAGCAGAAGAAGGCCATCGTGGACCTGCTGTTCAAGACCAACCGCAAGGTGACC  
Clone-2 1621 AGCGGCGAGCAGAAGAAGGCCATCGTGGACCTGCTGTTCAAGACCAACCGCAAGGTGACC  
Clone-3 1621 AGCGGCGAGCAGAAGAAGGCCATCGTGGACCTGCTGTTCAAGACCAACCGCAAGGTGACC  
WT-Cas9 1621 AGCGGCGAGCAGAAGAAGGCCATCGTGGACCTGCTGTTCAAGACCAACCGCAAGGTGACC  
eSpCas9 1621 AGCGGCGAGCAGAAGAAGGCCATCGTGGACCTGCTGTTCAAGACCAACCGCAAGGTGACC  
Cas9-HF1 1621 AGCGGCGAGCAGAAGAAGGCCATCGTGGACCTGCTGTTCAAGACCAACCGCAAGGTGACC  
evo-Cas9 1621 AGCGGCGAGCAGAAGAAGGCCATCGTGGACCTGCTGTTCAAGACCAACCGCAAGGTGACC  
Hypa-Cas9 1621 AGCGGCGAGCAGAAGAAGGCCATCGTGGACCTGCTGTTCAAGACCAACCGCAAGGTGACC  
xCas9-3.7 1621 AGCGGCGAGCAGAAGAAGGCCATCGTGGACCTGCTGTTCAAGACCAACCGCAAGGTGACC

Clone-1 1681 GTGAAGCAGCTGAAGGAGGACTACTTCAAGAAGATCGAGTGCTTCGACAGCGTGGAGATC  
Clone-2 1681 GTGAAGCAGCTGAAGGAGGACTACTTCAAGAAGATCGAGTGCTTCGACAGCGTGGAGATC  
Clone-3 1681 GTGAAGCAGCTGAAGGAGGACTACTTCAAGAAGATCGAGTGCTTCGACAGCGTGGAGATC  
WT-Cas9 1681 GTGAAGCAGCTGAAGGAGGACTACTTCAAGAAGATCGAGTGCTTCGACAGCGTGGAGATC  
eSpCas9 1681 GTGAAGCAGCTGAAGGAGGACTACTTCAAGAAGATCGAGTGCTTCGACAGCGTGGAGATC  
Cas9-HF1 1681 GTGAAGCAGCTGAAGGAGGACTACTTCAAGAAGATCGAGTGCTTCGACAGCGTGGAGATC  
evo-Cas9 1681 GTGAAGCAGCTGAAGGAGGACTACTTCAAGAAGATCGAGTGCTTCGACAGCGTGGAGATC  
Hypa-Cas9 1681 GTGAAGCAGCTGAAGGAGGACTACTTCAAGAAGATCGAGTGCTTCGACAGCGTGGAGATC  
xCas9-3.7 1681 GTGAAGCAGCTGAAGGAGGACTACTTCAAGAAGATCGAGTGCTTCGACAGCGTGGAGATC

Clone-1 1741 AGCGGCGTGGAGGACCGCTTCAACGCCAGCCTGGGCACCTACCACGACCTGCTGAAGATC  
Clone-2 1741 AGCGGCGTGGAGGACCGCTTCAACGCCAGCCTGGGCACCTACCACGACCTGCTGAAGATC  
Clone-3 1741 AGCGGCGTGGAGGACCGCTTCAACGCCAGCCTGGGCACCTACCACGACCTGCTGAAGATC  
WT-Cas9 1741 AGCGGCGTGGAGGACCGCTTCAACGCCAGCCTGGGCACCTACCACGACCTGCTGAAGATC  
eSpCas9 1741 AGCGGCGTGGAGGACCGCTTCAACGCCAGCCTGGGCACCTACCACGACCTGCTGAAGATC  
Cas9-HF1 1741 AGCGGCGTGGAGGACCGCTTCAACGCCAGCCTGGGCACCTACCACGACCTGCTGAAGATC  
evo-Cas9 1741 AGCGGCGTGGAGGACCGCTTCAACGCCAGCCTGGGCACCTACCACGACCTGCTGAAGATC  
Hypa-Cas9 1741 AGCGGCGTGGAGGACCGCTTCAACGCCAGCCTGGGCACCTACCACGACCTGCTGAAGATC  
xCas9-3.7 1741 AGCGGCGTGGAGGACCGCTTCAACGCCAGCCTGGGCACCTACCACGACCTGCTGAAGATC

Clone-1 1801 ATCAAGGACAAGGACTTCCTGGACAACGAGGAGAACGAGGACATCCTGGAGGACATCGTG  
Clone-2 1801 AACAAGGACAAGGACTTCCTGGACAACGAGGAGAACGAGGACATCCTGGAGGACATCGTG  
Clone-3 1801 ATCAAGGACAAGGACTTCCTGGACAACGAGGAGAACGAGGACATCCTGGAGGACATCGTG  
WT-Cas9 1801 ATCAAGGACAAGGACTTCCTGGACAACGAGGAGAACGAGGACATCCTGGAGGACATCGTG  
eSpCas9 1801 ATCAAGGACAAGGACTTCCTGGACAACGAGGAGAACGAGGACATCCTGGAGGACATCGTG  
Cas9-HF1 1801 ATCAAGGACAAGGACTTCCTGGACAACGAGGAGAACGAGGACATCCTGGAGGACATCGTG  
evo-Cas9 1801 ATCAAGGACAAGGACTTCCTGGACAACGAGGAGAACGAGGACATCCTGGAGGACATCGTG  
Hypa-Cas9 1801 ATCAAGGACAAGGACTTCCTGGACAACGAGGAGAACGAGGACATCCTGGAGGACATCGTG  
xCas9-3.7 1801 ATCAAGGACAAGGACTTCCTGGACAACGAGGAGAACGAGGACATCCTGGAGGACATCGTG

Clone-1 1861 CTGACCCTGACCCTGTTTCGAGGACCGCGAGATGATCGAGGAGCGCCTGAAGACCTACGCC  
Clone-2 1861 CTGACCCTGACCCTGTTTCGAGGACCGCGAGATGATCGAGGAGCGCCTGAAGACCTACGCC  
Clone-3 1861 TTGACCCTGACCCTGTTTCGAGGACCGCGAGATGATCGAGGAGCGCCTGAAGACCTACGCC  
WT-Cas9 1861 CTGACCCTGACCCTGTTTCGAGGACCGCGAGATGATCGAGGAGCGCCTGAAGACCTACGCC  
eSpCas9 1861 CTGACCCTGACCCTGTTTCGAGGACCGCGAGATGATCGAGGAGCGCCTGAAGACCTACGCC  
Cas9-HF1 1861 CTGACCCTGACCCTGTTTCGAGGACCGCGAGATGATCGAGGAGCGCCTGAAGACCTACGCC  
evo-Cas9 1861 CTGACCCTGACCCTGTTTCGAGGACCGCGAGATGATCGAGGAGCGCCTGAAGACCTACGCC  
Hypa-Cas9 1861 CTGACCCTGACCCTGTTTCGAGGACCGCGAGATGATCGAGGAGCGCCTGAAGACCTACGCC  
xCas9-3.7 1861 CTGACCCTGACCCTGTTTCGAGGACCGCGAGATGATCGAGGAGCGCCTGAAGACCTACGCC

Clone-1 1921 CACCTGTTTCGACGACAAGGTGATGAAGCAGCTGAAGCGCCGCCGCTACACCGGCTGGGGC  
Clone-2 1921 CACCTGTTTCGACGACAAGGTGATGAAGCAGCTGAAGCGCCGCCGCTACACCGGCTGGGGC  
Clone-3 1921 CACCTGTTTCGACGACAAGGTGATGAAGCAGCTGAAGCGCCGCCGCTACACCGGCTGGGGC  
WT-Cas9 1921 CACCTGTTTCGACGACAAGGTGATGAAGCAGCTGAAGCGCCGCCGCTACACCGGCTGGGGC  
eSpCas9 1921 CACCTGTTTCGACGACAAGGTGATGAAGCAGCTGAAGCGCCGCCGCTACACCGGCTGGGGC  
Cas9-HF1 1921 CACCTGTTTCGACGACAAGGTGATGAAGCAGCTGAAGCGCCGCCGCTACACCGGCTGGGGC  
evo-Cas9 1921 CACCTGTTTCGACGACAAGGTGATGAAGCAGCTGAAGCGCCGCCGCTACACCGGCTGGGGC  
Hypa-Cas9 1921 CACCTGTTTCGACGACAAGGTGATGAAGCAGCTGAAGCGCCGCCGCTACACCGGCTGGGGC  
xCas9-3.7 1921 CACCTGTTTCGACGACAAGGTGATGAAGCAGCTGAAGCGCCGCCGCTACACCGGCTGGGGC

Clone-1 1981 CGCCTGAGCCGCAAGCTTATCAACGGCATCCGCGACAAGCAGAGCGGCAAGACCATCCTG  
Clone-2 1981 CGCCTGAGCCGCAAGCTTATCAACGGCATCCGCGACAAGCAGAGCGGCAAGACCATCCTG  
Clone-3 1981 CGCCTGAGCCGCAAGCTTATCAACGGCATCCGCGACAAGCAGAGCGGCAAGACCATCCTG  
WT-Cas9 1981 CGCCTGAGCCGCAAGCTTATCAACGGCATCCGCGACAAGCAGAGCGGCAAGACCATCCTG  
eSpCas9 1981 CGCCTGAGCCGCAAGCTTATCAACGGCATCCGCGACAAGCAGAGCGGCAAGACCATCCTG  
Cas9-HF1 1981 GCCTGAGCCGCAAGCTTATCAACGGCATCCGCGACAAGCAGAGCGGCAAGACCATCCTG  
evo-Cas9 1981 CAGCTGAGCCGCAAGCTTATCAACGGCATCCGCGACAAGCAGAGCGGCAAGACCATCCTG  
Hypa-Cas9 1981 CGCCTGAGCCGCAAGCTTATCAACGGCATCCGCGACAAGCAGAGCGGCAAGACCATCCTG  
xCas9-3.7 1981 CGCCTGAGCCGCAAGCTTATCAACGGCATCCGCGACAAGCAGAGCGGCAAGACCATCCTG

Clone-1 2041 GACTTCCTGAAGAGCGACGGCTTCGCCAACCGCAACTTCATGCAGCTGATCCACGACGAC  
Clone-2 2041 GACTTCCTGAAGAGCGACGGCTTCGCCAACCGCAACTTCATGCAGCTGATCCACGACGAC  
Clone-3 2041 GACTTCCTGAAGAGCGACGGCTTCGCCAACCGCAACTTCATGCAGCTGATCCACGACGAC  
WT-Cas9 2041 GACTTCCTGAAGAGCGACGGCTTCGCCAACCGCAACTTCATGCAGCTGATCCACGACGAC  
eSpCas9 2041 GACTTCCTGAAGAGCGACGGCTTCGCCAACCGCAACTTCATGCAGCTGATCCACGACGAC  
Cas9-HF1 2041 GACTTCCTGAAGAGCGACGGCTTCGCCAACCGCAACTTCATGCAGCTGATCCACGACGAC  
evo-Cas9 2041 GACTTCCTGAAGAGCGACGGCTTCGCCAACCGCAACTTCATGCAGCTGATCCACGACGAC  
Hypa-Cas9 2041 GACTTCCTGAAGAGCGACGGCTTCGCCAACCGCGCCTTCGCGGCTGATCGCAGACGAC  
xCas9-3.7 2041 GACTTCCTGAAGAGCGACGGCTTCGCCAACCGCAACTTCATCCAGCTGATCCACGACGAC

Clone-1 2101 AGCCTGACCTTCAAGGAGGACATCCAGAAGGCCAGGTGAGCGGCCAGGGCGACAGCCTG  
Clone-2 2101 AGCCTGACCTTCAAGGAGGACATCCAGAAGGCCAGGTGAGCGGCCAGGGCGACAGCCTG  
Clone-3 2101 AGCCTGACCTTCAAGGAGGACATCCAGAAGGCCAGGTGAGCGGCCAGGGCGACAGCCTG  
WT-Cas9 2101 AGCCTGACCTTCAAGGAGGACATCCAGAAGGCCAGGTGAGCGGCCAGGGCGACAGCCTG  
eSpCas9 2101 AGCCTGACCTTCAAGGAGGACATCCAGAAGGCCAGGTGAGCGGCCAGGGCGACAGCCTG  
Cas9-HF1 2101 AGCCTGACCTTCAAGGAGGACATCCAGAAGGCCAGGTGAGCGGCCAGGGCGACAGCCTG  
evo-Cas9 2101 AGCCTGACCTTCAAGGAGGACATCCAGAAGGCCAGGTGAGCGGCCAGGGCGACAGCCTG  
Hypa-Cas9 2101 AGCCTGACCTTCAAGGAGGACATCCAGAAGGCCAGGTGAGCGGCCAGGGCGACAGCCTG  
xCas9-3.7 2101 AGCCTGACCTTCAAGGAGGACATCCAGAAGGCCAGGTGAGCGGCCAGGGCGACAGCCTG

Clone-1 2161 CACGAGCACATCGCCAACCTGGCCGGCAGCCCCGCCATCAAGAAGGGCATCCTGCAGACC  
Clone-2 2161 CACGAGCACATCGCCAACCTGGCCGGCAGCCCCGCCATCAAGAAGGGCATCCTGCAGACC  
Clone-3 2161 CACGAGCACATCGCCAACCTGGCCGGCAGCCCCGCCATCAAGAAGGGCATCCTGCAGACC  
WT-Cas9 2161 CACGAGCACATCGCCAACCTGGCCGGCAGCCCCGCCATCAAGAAGGGCATCCTGCAGACC  
eSpCas9 2161 CACGAGCACATCGCCAACCTGGCCGGCAGCCCCGCCATCAAGAAGGGCATCCTGCAGACC  
Cas9-HF1 2161 CACGAGCACATCGCCAACCTGGCCGGCAGCCCCGCCATCAAGAAGGGCATCCTGCAGACC  
evo-Cas9 2161 CACGAGCACATCGCCAACCTGGCCGGCAGCCCCGCCATCAAGAAGGGCATCCTGCAGACC  
Hypa-Cas9 2161 CACGAGCACATCGCCAACCTGGCCGGCAGCCCCGCCATCAAGAAGGGCATCCTGCAGACC  
xCas9-3.7 2161 CACGAGCACATCGCCAACCTGGCCGGCAGCCCCGCCATCAAGAAGGGCATCCTGCAGACC

Clone-1 2221 GTGAAGGTGGTGGACGAGCTGGTGAAGGTGATGGGCCGCCACAAGCCCAGAACATCGTG  
Clone-2 2221 GTGAAGGTGGTGGACGAGCTGGTGAAGGTGATGGGCCGCCACAAGCCCAGAACATCGTG  
Clone-3 2221 GTGAAGGTGGTGGACGAGCTGGTGAAGGTGATGGGCCGCCACAAGCCCAGAACATCGTG  
WT-Cas9 2221 GTGAAGGTGGTGGACGAGCTGGTGAAGGTGATGGGCCGCCACAAGCCCAGAACATCGTG  
eSpCas9 2221 GTGAAGGTGGTGGACGAGCTGGTGAAGGTGATGGGCCGCCACAAGCCCAGAACATCGTG  
Cas9-HF1 2221 GTGAAGGTGGTGGACGAGCTGGTGAAGGTGATGGGCCGCCACAAGCCCAGAACATCGTG  
evo-Cas9 2221 GTGAAGGTGGTGGACGAGCTGGTGAAGGTGATGGGCCGCCACAAGCCCAGAACATCGTG  
Hypa-Cas9 2221 GTGAAGGTGGTGGACGAGCTGGTGAAGGTGATGGGCCGCCACAAGCCCAGAACATCGTG  
xCas9-3.7 2221 GTGAAGGTGGTGGACGAGCTGGTGAAGGTGATGGGCCGCCACAAGCCCAGAACATCGTG

Clone-1 2281 ATCGAGATAGCCCCGCGAGAACCAGACCACCCAGAAGGGCCAGAAGAACAGCCGCGAGCGC  
Clone-2 2281 ATCGAGATAGCCCCGCGAGAACCAGACCACCCAGAAGGGCCAGAAGAACAGCCGCGAGCGC  
Clone-3 2281 ATCGAGATAGCCCCGCGAGAACCAGACCACCCAGAAGGGCCAGAAGAACAGCCGCGAGCGC  
WT-Cas9 2281 ATCGAGATAGCCCCGCGAGAACCAGACCACCCAGAAGGGCCAGAAGAACAGCCGCGAGCGC  
eSpCas9 2281 ATCGAGATAGCCCCGCGAGAACCAGACCACCCAGAAGGGCCAGAAGAACAGCCGCGAGCGC  
Cas9-HF1 2281 ATCGAGATAGCCCCGCGAGAACCAGACCACCCAGAAGGGCCAGAAGAACAGCCGCGAGCGC  
evo-Cas9 2281 ATCGAGATAGCCCCGCGAGAACCAGACCACCCAGAAGGGCCAGAAGAACAGCCGCGAGCGC  
Hypa-Cas9 2281 ATCGAGATAGCCCCGCGAGAACCAGACCACCCAGAAGGGCCAGAAGAACAGCCGCGAGCGC  
xCas9-3.7 2281 ATCGAGATAGCCCCGCGAGAACCAGACCACCCAGAAGGGCCAGAAGAACAGCCGCGAGCGC

Clone-1 2341 ATGAAGCGCATCGAGGAGGGCATCAAGGAGCTGGGCAGCCAGATCCTGAAGGAGCACCCC  
Clone-2 2341 ATGAAGCGCATCGAGGAGGGCATCAAGGAGCTGGGCAGCCAGATCCTGAAGGAGCACCCC  
Clone-3 2341 ATGAAGCGCATCGAGGAGGGCATCAAGGAGCTGGGCAGCCAGATCCTGAAGGAGCACCCC  
WT-Cas9 2341 ATGAAGCGCATCGAGGAGGGCATCAAGGAGCTGGGCAGCCAGATCCTGAAGGAGCACCCC  
eSpCas9 2341 ATGAAGCGCATCGAGGAGGGCATCAAGGAGCTGGGCAGCCAGATCCTGAAGGAGCACCCC  
Cas9-HF1 2341 ATGAAGCGCATCGAGGAGGGCATCAAGGAGCTGGGCAGCCAGATCCTGAAGGAGCACCCC  
evo-Cas9 2341 ATGAAGCGCATCGAGGAGGGCATCAAGGAGCTGGGCAGCCAGATCCTGAAGGAGCACCCC  
Hypa-Cas9 2341 ATGAAGCGCATCGAGGAGGGCATCAAGGAGCTGGGCAGCCAGATCCTGAAGGAGCACCCC  
xCas9-3.7 2341 ATGAAGCGCATCGAGGAGGGCATCAAGGAGCTGGGCAGCCAGATCCTGAAGGAGCACCCC

Clone-1 2401 GTGGAGAACACCCAGCTGCAGAACGAGAAGCTGTACCTGTACTACCTGCAGAACGGCCGC  
Clone-2 2401 GTGGAGAACACCCAGCTGCAGAACGAGAAGCTGTACCTGTACTACCTGCAGAACGGCCGC  
Clone-3 2401 GTGGAGAACACCCAGCTGCAGAACGAGAAGCTGTACCTGTACTACCTGCAGAACGGCCGC  
WT-Cas9 2401 GTGGAGAACACCCAGCTGCAGAACGAGAAGCTGTACCTGTACTACCTGCAGAACGGCCGC  
eSpCas9 2401 GTGGAGAACACCCAGCTGCAGAACGAGAAGCTGTACCTGTACTACCTGCAGAACGGCCGC  
Cas9-HF1 2401 GTGGAGAACACCCAGCTGCAGAACGAGAAGCTGTACCTGTACTACCTGCAGAACGGCCGC  
evo-Cas9 2401 GTGGAGAACACCCAGCTGCAGAACGAGAAGCTGTACCTGTACTACCTGCAGAACGGCCGC  
Hypa-Cas9 2401 GTGGAGAACACCCAGCTGCAGAACGAGAAGCTGTACCTGTACTACCTGCAGAACGGCCGC  
xCas9-3.7 2401 GTGGAGAACACCCAGCTGCAGAACGAGAAGCTGTACCTGTACTACCTGCAGAACGGCCGC

Clone-1 2461 GACATGTACGTGGACCAGGAGCTGGACATCAACCGCCTGAGCGACTACGACGTGGACCAC  
Clone-2 2461 GACATGTACGTGGACCAGGAGCTGGACATCAACCGCCTGAGCGACTACGACGTGGACCAC  
Clone-3 2461 GACATGTACGTGGACCAGGAGCTGGACATCAACCGCCTGAGCGACTACGACGTGGACCAC  
WT-Cas9 2461 GACATGTACGTGGACCAGGAGCTGGACATCAACCGCCTGAGCGACTACGACGTGGACCAC  
eSpCas9 2461 GACATGTACGTGGACCAGGAGCTGGACATCAACCGCCTGAGCGACTACGACGTGGACCAC  
Cas9-HF1 2461 GACATGTACGTGGACCAGGAGCTGGACATCAACCGCCTGAGCGACTACGACGTGGACCAC  
evo-Cas9 2461 GACATGTACGTGGACCAGGAGCTGGACATCAACCGCCTGAGCGACTACGACGTGGACCAC  
Hypa-Cas9 2461 GACATGTACGTGGACCAGGAGCTGGACATCAACCGCCTGAGCGACTACGACGTGGACCAC  
xCas9-3.7 2461 GACATGTACGTGGACCAGGAGCTGGACATCAACCGCCTGAGCGACTACGACGTGGACCAC

Clone-1 2521 ATCGTGCCCCAGAGCTTCTGAAGGACGACAGCATCGACAACAAGGTGCTGACCCGCAGC  
Clone-2 2521 ATCGTGCCCCAGAGCTTCTGAAGGACGACAGCATCGACAACAAGGTGCTGACCCGCAGC  
Clone-3 2521 ATCGTGCCCCAGAGCTTCTGAAGGACGACAGCATCGACAACAAGGTGCTGACCCGCAGC  
WT-Cas9 2521 ATCGTGCCCCAGAGCTTCTGAAGGACGACAGCATCGACAACAAGGTGCTGACCCGCAGC  
eSpCas9 2521 ATCGTGCCCCAGAGCTTCTG**GC**GGACGACAGCATCGACAACAAGGTGCTGACCCGCAGC  
Cas9-HF1 2521 ATCGTGCCCCAGAGCTTCTGAAGGACGACAGCATCGACAACAAGGTGCTGACCCGCAGC  
evo-Cas9 2521 ATCGTGCCCCAGAGCTTCTGAAGGACGACAGCATCGACAACAAGGTGCTGACCCGCAGC  
Hypa-Cas9 2521 ATCGTGCCCCAGAGCTTCTGAAGGACGACAGCATCGACAACAAGGTGCTGACCCGCAGC  
xCas9-3.7 2521 ATCGTGCCCCAGAGCTTCTGAAGGACGACAGCATCGACAACAAGGTGCTGACCCGCAGC

Clone-1 2581 GACAAGAACCGCGGCAAGAGCGACAACGTGCCAGCGAGGAGGTGGTGAAGAAGATGAAG  
Clone-2 2581 GACAAGAACCGCGGCAAGAGCGACAACGTGCCAGCGAGGAGGTGGTGAAGAAGATGAAG  
Clone-3 2581 GACAAGAACCGCGGCAAGAGCGACAACGTGCCAGCGAGGAGGTGGTGAAGAAGATGAAG  
WT-Cas9 2581 GACAAGAACCGCGGCAAGAGCGACAACGTGCCAGCGAGGAGGTGGTGAAGAAGATGAAG  
eSpCas9 2581 GACAAGAACCGCGGCAAGAGCGACAACGTGCCAGCGAGGAGGTGGTGAAGAAGATGAAG  
Cas9-HF1 2581 GACAAGAACCGCGGCAAGAGCGACAACGTGCCAGCGAGGAGGTGGTGAAGAAGATGAAG  
evo-Cas9 2581 GACAAGAACCGCGGCAAGAGCGACAACGTGCCAGCGAGGAGGTGGTGAAGAAGATGAAG  
Hypa-Cas9 2581 GACAAGAACCGCGGCAAGAGCGACAACGTGCCAGCGAGGAGGTGGTGAAGAAGATGAAG  
xCas9-3.7 2581 GACAAGAACCGCGGCAAGAGCGACAACGTGCCAGCGAGGAGGTGGTGAAGAAGATGAAG

Clone-1 2641 AACTACTGGCGCCAGCTGCTGAACGCCA**A**TTCTGATCACCCAGCGCAAGTTCGACAACCTG  
Clone-2 2641 AACTACTGGCGCCAGCTGCTGAACGCCAAGCTGATCACCCAGCGCAAGTTCGACAACCTG  
Clone-3 2641 AACTACTGGCGCCAGCTGCTGAACGCCAAGCTGATCACCCAGCGCAAGTTCGACAACCTG  
WT-Cas9 2641 AACTACTGGCGCCAGCTGCTGAACGCCAAGCTGATCACCCAGCGCAAGTTCGACAACCTG  
eSpCas9 2641 AACTACTGGCGCCAGCTGCTGAACGCCAAGCTGATCACCCAGCGCAAGTTCGACAACCTG  
Cas9-HF1 2641 AACTACTGGCGCCAGCTGCTGAACGCCAAGCTGATCACCCAGCGCAAGTTCGACAACCTG  
evo-Cas9 2641 AACTACTGGCGCCAGCTGCTGAACGCCAAGCTGATCACCCAGCGCAAGTTCGACAACCTG  
Hypa-Cas9 2641 AACTACTGGCGCCAGCTGCTGAACGCCAAGCTGATCACCCAGCGCAAGTTCGACAACCTG  
xCas9-3.7 2641 AACTACTGGCGCCAGCTGCTGAACGCCAAGCTGATCACCCAGCGCAAGTTCGACAACCTG

Clone-1 2701 ACCAAGGCCGAGCGCGGCGGCCTGAGCGAGCTGGACAAGGCCGGCTTCATCAAGCGCCAG  
Clone-2 2701 ACCAAGGCCGAGCGCGGCGGCCTGAGCGAGCTGGACAAGGCCGGCTTCATCAAGCGCCAG  
Clone-3 2701 ACCAAGGCCGAGCGCGGCGGCCTGAGCGAGCTGGACAAGGCCGGCTTCATCAAGCGCCAG  
WT-Cas9 2701 ACCAAGGCCGAGCGCGGCGGCCTGAGCGAGCTGGACAAGGCCGGCTTCATCAAGCGCCAG  
eSpCas9 2701 ACCAAGGCCGAGCGCGGCGGCCTGAGCGAGCTGGACAAGGCCGGCTTCATCAAGCGCCAG  
Cas9-HF1 2701 ACCAAGGCCGAGCGCGGCGGCCTGAGCGAGCTGGACAAGGCCGGCTTCATCAAGCGCCAG  
evo-Cas9 2701 ACCAAGGCCGAGCGCGGCGGCCTGAGCGAGCTGGACAAGGCCGGCTTCATCAAGCGCCAG  
Hypa-Cas9 2701 ACCAAGGCCGAGCGCGGCGGCCTGAGCGAGCTGGACAAGGCCGGCTTCATCAAGCGCCAG  
xCas9-3.7 2701 ACCAAGGCCGAGCGCGGCGGCCTGAGCGAGCTGGACAAGGCCGGCTTCATCAAGCGCCAG

Clone-1 2761 CTGGTGGAGACCCGCCAGATCACCAAGCACGTGGCCCAGATCCTGGACAGCCGCATGAAC  
Clone-2 2761 CTGGTGGAGACCCGCCAGATCACCAAGCACGTGGCCCAGATCCTGGACAGCCGCATGAAC  
Clone-3 2761 CTGGTGGAGACCCGCCAGATCACCAAGCACGTGGCCCAGATCCTGGACAGCCGCATGAAC  
WT-Cas9 2761 CTGGTGGAGACCCGCCAGATCACCAAGCACGTGGCCCAGATCCTGGACAGCCGCATGAAC  
eSpCas9 2761 CTGGTGGAGACCCGCCAGATCACCAAGCACGTGGCCCAGATCCTGGACAGCCGCATGAAC  
Cas9-HF1 2761 CTGGTGGAGACCCGC**GC**GATCACCAAGCACGTGGCCCAGATCCTGGACAGCCGCATGAAC  
evo-Cas9 2761 CTGGTGGAGACCCGCCAGATCACCAAGCACGTGGCCCAGATCCTGGACAGCCGCATGAAC  
Hypa-Cas9 2761 CTGGTGGAGACCCGCCAGATCACCAAGCACGTGGCCCAGATCCTGGACAGCCGCATGAAC  
xCas9-3.7 2761 CTGGTGGAGACCCGCCAGATCACCAAGCACGTGGCCCAGATCCTGGACAGCCGCATGAAC

Clone-1 2821 ACCAAGTACGACGAGAACGACAAGCTGATCCGCGAGGTGAAGGTGATCACCCCTGAAGAGC  
Clone-2 2821 ACCAAGTACGACGAGAACGACAAGCTGATCCGCGAGGTGAAGGTGATCACCCCTGAAGAGC  
Clone-3 2821 ACCAAGTACGACGAGAACGACAAGCTGATCCGCGAGGTGAAGGTGATCACCCCTGAAGAGC  
WT-Cas9 2821 ACCAAGTACGACGAGAACGACAAGCTGATCCGCGAGGTGAAGGTGATCACCCCTGAAGAGC  
eSpCas9 2821 ACCAAGTACGACGAGAACGACAAGCTGATCCGCGAGGTGAAGGTGATCACCCCTGAAGAGC  
Cas9-HF1 2821 ACCAAGTACGACGAGAACGACAAGCTGATCCGCGAGGTGAAGGTGATCACCCCTGAAGAGC  
evo-Cas9 2821 ACCAAGTACGACGAGAACGACAAGCTGATCCGCGAGGTGAAGGTGATCACCCCTGAAGAGC  
Hypa-Cas9 2821 ACCAAGTACGACGAGAACGACAAGCTGATCCGCGAGGTGAAGGTGATCACCCCTGAAGAGC  
xCas9-3.7 2821 ACCAAGTACGACGAGAACGACAAGCTGATCCGCGAGGTGAAGGTGATCACCCCTGAAGAGC

Clone-1 2881 AAGCTGGTGAGCGACTTCCGCAAGGACTTCCAGTTCTACAAGGTGCGCGAGATCAACAAC  
Clone-2 2881 AAGCTGGTGAGCGACTTCCGCAAGGACTTCCAGTTCTACAAGGTGCGCGAGATCAACAAC  
Clone-3 2881 AAGCTGGTGAGCGACTTCCGCAAGGACTTCCAGTTCTACAAGGTGCGCGAGATCAACAAC  
WT-Cas9 2881 AAGCTGGTGAGCGACTTCCGCAAGGACTTCCAGTTCTACAAGGTGCGCGAGATCAACAAC  
eSpCas9 2881 AAGCTGGTGAGCGACTTCCGCAAGGACTTCCAGTTCTACAAGGTGCGCGAGATCAACAAC  
Cas9-HF1 2881 AAGCTGGTGAGCGACTTCCGCAAGGACTTCCAGTTCTACAAGGTGCGCGAGATCAACAAC  
evo-Cas9 2881 AAGCTGGTGAGCGACTTCCGCAAGGACTTCCAGTTCTACAAGGTGCGCGAGATCAACAAC  
Hypa-Cas9 2881 AAGCTGGTGAGCGACTTCCGCAAGGACTTCCAGTTCTACAAGGTGCGCGAGATCAACAAC  
xCas9-3.7 2881 AAGCTGGTGAGCGACTTCCGCAAGGACTTCCAGTTCTACAAGGTGCGCGAGATCAACAAC

Clone-1 2941 TACCACCACGCCCACGACGCCTACCTGAACGCCGTGGTGGGCACCGCCCTGATCAAGAAG  
Clone-2 2941 TACCACCACGCCCACGACGCCTACCTGAACGCCGTGGTGGGCACCGCCCTGATCAAGAAG  
Clone-3 2941 TACCACCACGCCCACGACGCCTACCTGAACGCCGTGGTGGGCACCGCCCTGATCAAGAAG  
WT-Cas9 2941 TACCACCACGCCCACGACGCCTACCTGAACGCCGTGGTGGGCACCGCCCTGATCAAGAAG  
eSpCas9 2941 TACCACCACGCCCACGACGCCTACCTGAACGCCGTGGTGGGCACCGCCCTGATCAAGAAG  
Cas9-HF1 2941 TACCACCACGCCCACGACGCCTACCTGAACGCCGTGGTGGGCACCGCCCTGATCAAGAAG  
evo-Cas9 2941 TACCACCACGCCCACGACGCCTACCTGAACGCCGTGGTGGGCACCGCCCTGATCAAGAAG  
Hypa-Cas9 2941 TACCACCACGCCCACGACGCCTACCTGAACGCCGTGGTGGGCACCGCCCTGATCAAGAAG  
xCas9-3.7 2941 TACCACCACGCCCACGACGCCTACCTGAACGCCGTGGTGGGCACCGCCCTGATCAAGAAG

Clone-1 3001 TACCCCAAGCTGGAGAGCGAGTTCGTGTACGGCGACTACAAGGTGTACGACGTGCGCAAG  
Clone-2 3001 TACCCCAAGCTGGAGAGCGAGTTCGTGTACGGCGACTACAAGGTGTACGACGTGCGCAAG  
Clone-3 3001 TACCCCAAGCTGGAGAGCGAGTTCGTGTACGGCGACTACAAGGTGTACGACGTGCGCAAG  
WT-Cas9 3001 TACCCCAAGCTGGAGAGCGAGTTCGTGTACGGCGACTACAAGGTGTACGACGTGCGCAAG  
eSpCas9 3001 TACCCCAAGCTGGAGAGCGAGTTCGTGTACGGCGACTACAAGGTGTACGACGTGCGCAAG  
Cas9-HF1 3001 TACCCCAAGCTGGAGAGCGAGTTCGTGTACGGCGACTACAAGGTGTACGACGTGCGCAAG  
evo-Cas9 3001 TACCCCAAGCTGGAGAGCGAGTTCGTGTACGGCGACTACAAGGTGTACGACGTGCGCAAG  
Hypa-Cas9 3001 TACCCCAAGCTGGAGAGCGAGTTCGTGTACGGCGACTACAAGGTGTACGACGTGCGCAAG  
xCas9-3.7 3001 TACCCCAAGCTGGAGAGCGAGTTCGTGTACGGCGACTACAAGGTGTACGACGTGCGCAAG

Clone-1 3061 ATGATCGCTTAAGAGCGAGCAGGAGATCGGCAAGGCCACCGCCAAGTACTTCTTCTACAGC  
Clone-2 3061 ATGATCGCCAAGAGCGAGCAGGAGATCGGCAAGGCCACCGCCAAGTACTTCTTCTACAGC  
Clone-3 3061 ATGATCGCCAAGAGCGAGCAGGAGATCGGCAAGGCCACCGCCAAGTACTTCTTCTACAGC  
WT-Cas9 3061 ATGATCGCCAAGAGCGAGCAGGAGATCGGCAAGGCCACCGCCAAGTACTTCTTCTACAGC  
eSpCas9 3061 ATGATCGCCAAGAGCGAGCAGGAGATCGGCAAGGCCACCGCCAAGTACTTCTTCTACAGC  
Cas9-HF1 3061 ATGATCGCCAAGAGCGAGCAGGAGATCGGCAAGGCCACCGCCAAGTACTTCTTCTACAGC  
evo-Cas9 3061 ATGATCGCCAAGAGCGAGCAGGAGATCGGCAAGGCCACCGCCAAGTACTTCTTCTACAGC  
Hypa-Cas9 3061 ATGATCGCCAAGAGCGAGCAGGAGATCGGCAAGGCCACCGCCAAGTACTTCTTCTACAGC  
xCas9-3.7 3061 ATGATCGCCAAGAGCGAGCAGGAGATCGGCAAGGCCACCGCCAAGTACTTCTTCTACAGC

Clone-1 3121 AACATCATGAACTTCTTCAAGACCGAGATCACCCCTGGCCAACGGCGAGATCCGCAAGCGC  
Clone-2 3121 AACATCATGAACTTCTTCAAGACCGAGATCACCCCTGGCCAACGGCGAGATCCGCAAGCGC  
Clone-3 3121 AACATCATGAACTTCTTCAAGACCGAGATCACCCCTGGCCAACGGCGAGATCCGCAAGCGC  
WT-Cas9 3121 AACATCATGAACTTCTTCAAGACCGAGATCACCCCTGGCCAACGGCGAGATCCGCAAGCGC  
eSpCas9 3121 AACATCATGAACTTCTTCAAGACCGAGATCACCCCTGGCCAACGGCGAGATCCGCAAGCGC  
Cas9-HF1 3121 AACATCATGAACTTCTTCAAGACCGAGATCACCCCTGGCCAACGGCGAGATCCGCAAGCGC  
evo-Cas9 3121 AACATCATGAACTTCTTCAAGACCGAGATCACCCCTGGCCAACGGCGAGATCCGCAAGCGC  
Hypa-Cas9 3121 AACATCATGAACTTCTTCAAGACCGAGATCACCCCTGGCCAACGGCGAGATCCGCAAGCGC  
xCas9-3.7 3121 AACATCATGAACTTCTTCAAGACCGAGATCACCCCTGGCCAACGGCGAGATCCGCAAGCGC

Clone-1 3181 CCCCTGATCGAGACCAACGGCGAGACCGGCGAGATCGTGTGGGACAAGGGCCGCGACTTC  
Clone-2 3181 CCCCTGATCGAGACCAACGGCGAGACCGGCGAGATCGTGTGGGACAAGGGCCGCGACTTC  
Clone-3 3181 CCCCTGATCGAGACCAACGGCGAGACCGGCGAGATCGTGTGGGACAAGGGCCGCGACTTC  
WT-Cas9 3181 CCCCTGATCGAGACCAACGGCGAGACCGGCGAGATCGTGTGGGACAAGGGCCGCGACTTC  
eSpCas9 3181 CCCCTGATCGAGACCAACGGCGAGACCGGCGAGATCGTGTGGGACAAGGGCCGCGACTTC  
Cas9-HF1 3181 CCCCTGATCGAGACCAACGGCGAGACCGGCGAGATCGTGTGGGACAAGGGCCGCGACTTC  
evo-Cas9 3181 CCCCTGATCGAGACCAACGGCGAGACCGGCGAGATCGTGTGGGACAAGGGCCGCGACTTC  
Hypa-Cas9 3181 CCCCTGATCGAGACCAACGGCGAGACCGGCGAGATCGTGTGGGACAAGGGCCGCGACTTC  
xCas9-3.7 3181 CCCCTGATCGAGACCAACGGCGAGACCGGCGAGATCGTGTGGGACAAGGGCCGCGACTTC

Clone-1 3241 GCCACCGTGC GCAAGGTGCTGAGCATGCCCCAGGTGAACATCGTGAAGAAGACCGAGGTG  
Clone-2 3241 GCCACCGTGC GCAAGGTGCTGAGCATGCCCCAGGTGAACATCGTGAAGAAGACCGAGGTG  
Clone-3 3241 GCCACCGTGC GCAAGGTGCTGAGCATGCCCCAGGTGAACATCGTGAAGAAGACCGAGGTG  
WT-Cas9 3241 GCCACCGTGC GCAAGGTGCTGAGCATGCCCCAGGTGAACATCGTGAAGAAGACCGAGGTG  
eSpCas9 3241 GCCACCGTGC GCAAGGTGCTGAGCATGCCCCAGGTGAACATCGTGAAGAAGACCGAGGTG  
Cas9-HF1 3241 GCCACCGTGC GCAAGGTGCTGAGCATGCCCCAGGTGAACATCGTGAAGAAGACCGAGGTG  
evo-Cas9 3241 GCCACCGTGC GCAAGGTGCTGAGCATGCCCCAGGTGAACATCGTGAAGAAGACCGAGGTG  
Hypa-Cas9 3241 GCCACCGTGC GCAAGGTGCTGAGCATGCCCCAGGTGAACATCGTGAAGAAGACCGAGGTG  
xCas9-3.7 3241 GCCACCGTGC GCAAGGTGCTGAGCATGCCCCAGGTGAACATCGTGAAGAAGACCGAGGTG

Clone-1 3301 CAGACCGGCGGCTTCAGCAAGGAGAGCATCCTGCCAAGCGCAACAGCGACAAGCTGATC  
Clone-2 3301 CAGACCGGCGGCTTCAGCAAGGAGAGCATCCTGCCAAGCGCAACAGCGACAAGCTGATC  
Clone-3 3301 CAGACCGGCGGCTTCAGCAAGGAGAGCATCCTGCCAAGCGCAACAGCGACAAGCTGATC  
WT-Cas9 3301 CAGACCGGCGGCTTCAGCAAGGAGAGCATCCTGCCAAGCGCAACAGCGACAAGCTGATC  
eSpCas9 3301 CAGACCGGCGGCTTCAGCAAGGAGAGCATCCTGCCAAGCGCAACAGCGACAAGCTGATC  
Cas9-HF1 3301 CAGACCGGCGGCTTCAGCAAGGAGAGCATCCTGCCAAGCGCAACAGCGACAAGCTGATC  
evo-Cas9 3301 CAGACCGGCGGCTTCAGCAAGGAGAGCATCCTGCCAAGCGCAACAGCGACAAGCTGATC  
Hypa-Cas9 3301 CAGACCGGCGGCTTCAGCAAGGAGAGCATCCTGCCAAGCGCAACAGCGACAAGCTGATC  
xCas9-3.7 3301 CAGACCGGCGGCTTCAGCAAGGAGAGCATCCTGCCAAGCGCAACAGCGACAAGCTGATC

Clone-1 3361 GCCCGCAAGAAGGACTGGGACCCCAAGAAGTACGGCGGCTTCGACAGCCCCACCGTGGCC  
Clone-2 3361 GCCCGCAAGAAGGACTGGGACCCCAAGAAGTACGGCGGCTTCGACAGCCCCACCGTGGCC  
Clone-3 3361 GCCCGCAAGAAGGACTGGGACCCCAAGAAGTACGGCGGCTTCGACAGCCCCACCGTGGCC  
WT-Cas9 3361 GCCCGCAAGAAGGACTGGGACCCCAAGAAGTACGGCGGCTTCGACAGCCCCACCGTGGCC  
eSpCas9 3361 GCCCGCAAGAAGGACTGGGACCCCAAGAAGTACGGCGGCTTCGACAGCCCCACCGTGGCC  
Cas9-HF1 3361 GCCCGCAAGAAGGACTGGGACCCCAAGAAGTACGGCGGCTTCGACAGCCCCACCGTGGCC  
evo-Cas9 3361 GCCCGCAAGAAGGACTGGGACCCCAAGAAGTACGGCGGCTTCGACAGCCCCACCGTGGCC  
Hypa-Cas9 3361 GCCCGCAAGAAGGACTGGGACCCCAAGAAGTACGGCGGCTTCGACAGCCCCACCGTGGCC  
xCas9-3.7 3361 GCCCGCAAGAAGGACTGGGACCCCAAGAAGTACGGCGGCTTCGACAGCCCCACCGTGGCC

Clone-1 3421 TACAGCGTGCTGGTGGTGGCCAAAGGTGGAGAAGGGCAAGAGCAAGAAGCTGAAGAGCGTG  
Clone-2 3421 TACAGCGTGCTGGTGGTGGCCAAAGGTGGAGAAGGGCAAGAGCAAGAAGCTGAAGAGCGTG  
Clone-3 3421 TACAGCGTGCTGGTGGTGGCCAAAGGTGGAGAAGGGCAAGAGCAAGAAGCTGAAGAGCGTG  
WT-Cas9 3421 TACAGCGTGCTGGTGGTGGCCAAAGGTGGAGAAGGGCAAGAGCAAGAAGCTGAAGAGCGTG  
eSpCas9 3421 TACAGCGTGCTGGTGGTGGCCAAAGGTGGAGAAGGGCAAGAGCAAGAAGCTGAAGAGCGTG  
Cas9-HF1 3421 TACAGCGTGCTGGTGGTGGCCAAAGGTGGAGAAGGGCAAGAGCAAGAAGCTGAAGAGCGTG  
evo-Cas9 3421 TACAGCGTGCTGGTGGTGGCCAAAGGTGGAGAAGGGCAAGAGCAAGAAGCTGAAGAGCGTG  
Hypa-Cas9 3421 TACAGCGTGCTGGTGGTGGCCAAAGGTGGAGAAGGGCAAGAGCAAGAAGCTGAAGAGCGTG  
xCas9-3.7 3421 TACAGCGTGCTGGTGGTGGCCAAAGGTGGAGAAGGGCAAGAGCAAGAAGCTGAAGAGCGTG

Clone-1 3481 AAGGAGCTGCTGGGCATCACCATCATGGAGCGCAGCAGCTTCGAGAAGAACCCCATCGAC  
Clone-2 3481 AAGGAGCTGCTGGGCATCACCATCATGGAGCGCAGCAGCTTCGAGAAGAACCCCATCGAC  
Clone-3 3481 AAGGAGCTGCTGGGCATCACCATCATGGAGCGCAGCAGCTTCGAGAAGAACCCCATCGAC  
WT-Cas9 3481 AAGGAGCTGCTGGGCATCACCATCATGGAGCGCAGCAGCTTCGAGAAGAACCCCATCGAC  
eSpCas9 3481 AAGGAGCTGCTGGGCATCACCATCATGGAGCGCAGCAGCTTCGAGAAGAACCCCATCGAC  
Cas9-HF1 3481 AAGGAGCTGCTGGGCATCACCATCATGGAGCGCAGCAGCTTCGAGAAGAACCCCATCGAC  
evo-Cas9 3481 AAGGAGCTGCTGGGCATCACCATCATGGAGCGCAGCAGCTTCGAGAAGAACCCCATCGAC  
Hypa-Cas9 3481 AAGGAGCTGCTGGGCATCACCATCATGGAGCGCAGCAGCTTCGAGAAGAACCCCATCGAC  
xCas9-3.7 3481 AAGGAGCTGCTGGGCATCACCATCATGGAGCGCAGCAGCTTCGAGAAGAACCCCATCGAC

Clone-1 3541 TTCCTGGAGGCCAAGGGCTACAAGGAGGTGAAGAAGGACCTGATCATCAAGCTGCCCAAG  
Clone-2 3541 TTCCTGGAGGCCAAGGGCTACAAGGAGGTGAAGAAGGACCTGATCATCAAGCTGCCCAAG  
Clone-3 3541 TTCCTGGAGGCCAAGGGCTACAAGGAGGTGAAGAAGGACCTGATCATCAAGCTGCCCAAG  
WT-Cas9 3541 TTCCTGGAGGCCAAGGGCTACAAGGAGGTGAAGAAGGACCTGATCATCAAGCTGCCCAAG  
eSpCas9 3541 TTCCTGGAGGCCAAGGGCTACAAGGAGGTGAAGAAGGACCTGATCATCAAGCTGCCCAAG  
Cas9-HF1 3541 TTCCTGGAGGCCAAGGGCTACAAGGAGGTGAAGAAGGACCTGATCATCAAGCTGCCCAAG  
evo-Cas9 3541 TTCCTGGAGGCCAAGGGCTACAAGGAGGTGAAGAAGGACCTGATCATCAAGCTGCCCAAG  
Hypa-Cas9 3541 TTCCTGGAGGCCAAGGGCTACAAGGAGGTGAAGAAGGACCTGATCATCAAGCTGCCCAAG  
xCas9-3.7 3541 TTCCTGGAGGCCAAGGGCTACAAGGAGGTGAAGAAGGACCTGATCATCAAGCTGCCCAAG

Clone-1 3601 TACAGCCTGTTTCGAGCTGGAGAACGGCCGCAAGCGCATGCTGGCCAGCGCCGGCGAGCTG  
Clone-2 3601 TACAGCCTGTTTCGAGCTGGAGAACGGCCGCAAGCGCATGCTGGCCAGCGCCGGCGAGCTG  
Clone-3 3601 TACAGCCTGTTTCGAGCTGGAGAACGGCCGCAAGCGCATGCTGGCCAGCGCCGGCGAGCTG  
WT-Cas9 3601 TACAGCCTGTTTCGAGCTGGAGAACGGCCGCAAGCGCATGCTGGCCAGCGCCGGCGAGCTG  
eSpCas9 3601 TACAGCCTGTTTCGAGCTGGAGAACGGCCGCAAGCGCATGCTGGCCAGCGCCGGCGAGCTG  
Cas9-HF1 3601 TACAGCCTGTTTCGAGCTGGAGAACGGCCGCAAGCGCATGCTGGCCAGCGCCGGCGAGCTG  
evo-Cas9 3601 TACAGCCTGTTTCGAGCTGGAGAACGGCCGCAAGCGCATGCTGGCCAGCGCCGGCGAGCTG  
Hypa-Cas9 3601 TACAGCCTGTTTCGAGCTGGAGAACGGCCGCAAGCGCATGCTGGCCAGCGCCGGCGAGCTG  
xCas9-3.7 3601 TACAGCCTGTTTCGAGCTGGAGAACGGCCGCAAGCGCATGCTGGCCAGCGCCGGCGT<sup>T</sup>GCTG

Clone-1 3661 CAGAAGGGCAACGAGCTGGCCCTGCCAGCAAGTACGTGAACTTCCTGTACCTGGCCAGC  
Clone-2 3661 CAGAAGGGCAACGAGCTGGCCCTGCCAGCAAGTACGTGAACTTCCTGTACCTGGCCAGC  
Clone-3 3661 CAGAAGGGCAACGAGCTGGCCCTGCCAGCAAGTACGTGAACTTCCTGTACCTGGCCAGC  
WT-Cas9 3661 CAGAAGGGCAACGAGCTGGCCCTGCCAGCAAGTACGTGAACTTCCTGTACCTGGCCAGC  
eSpCas9 3661 CAGAAGGGCAACGAGCTGGCCCTGCCAGCAAGTACGTGAACTTCCTGTACCTGGCCAGC  
Cas9-HF1 3661 CAGAAGGGCAACGAGCTGGCCCTGCCAGCAAGTACGTGAACTTCCTGTACCTGGCCAGC  
evo-Cas9 3661 CAGAAGGGCAACGAGCTGGCCCTGCCAGCAAGTACGTGAACTTCCTGTACCTGGCCAGC  
Hypa-Cas9 3661 CAGAAGGGCAACGAGCTGGCCCTGCCAGCAAGTACGTGAACTTCCTGTACCTGGCCAGC  
xCas9-3.7 3661 CAGAAGGGCAACGAGCTGGCCCTGCCAGCAAGTACGTGAACTTCCTGTACCTGGCCAGC

Clone-1 3721 CACTACGAGAAGCTGAAGGGCAGCCCCGAGGACAACGAGCAGAAGCAGCTGTTTCGTGGAG  
Clone-2 3721 CACTACGAGAAGCTGAAGGGCAGCCCCGAGGACAACGAGCAGAAGCAGCTGTTTCGTGGAG  
Clone-3 3721 CACTACGAGAAGCTGAAGGGCAGCCCCGAGGACAACGAGCAGAAGCAGCTGTTTCGTGGAG  
WT-Cas9 3721 CACTACGAGAAGCTGAAGGGCAGCCCCGAGGACAACGAGCAGAAGCAGCTGTTTCGTGGAG  
eSpCas9 3721 CACTACGAGAAGCTGAAGGGCAGCCCCGAGGACAACGAGCAGAAGCAGCTGTTTCGTGGAG  
Cas9-HF1 3721 CACTACGAGAAGCTGAAGGGCAGCCCCGAGGACAACGAGCAGAAGCAGCTGTTTCGTGGAG  
evo-Cas9 3721 CACTACGAGAAGCTGAAGGGCAGCCCCGAGGACAACGAGCAGAAGCAGCTGTTTCGTGGAG  
Hypa-Cas9 3721 CACTACGAGAAGCTGAAGGGCAGCCCCGAGGACAACGAGCAGAAGCAGCTGTTTCGTGGAG  
xCas9-3.7 3721 CACTACGAGAAGCTGAAGGGCAGCCCCGAGGACAACGAGCAGAAGCAGCTGTTTCGTGGAG

Clone-1 3781 CAGCACAAGCACTACCTGGACGAGATCATCGAGCAGATCAGCGAGTTCAGCAAGCGCGTG  
Clone-2 3781 CAGCACAAGCACTACCTGGACGAGATCATCGAGCAGATCAGCGAGTTCAGCAAGCGCGTG  
Clone-3 3781 CAGCACAAGCACTACCTGGACGAGATCATCGAGCAGATCAGCGAGTTCAGCAAGCGCGTG  
WT-Cas9 3781 CAGCACAAGCACTACCTGGACGAGATCATCGAGCAGATCAGCGAGTTCAGCAAGCGCGTG  
eSpCas9 3781 CAGCACAAGCACTACCTGGACGAGATCATCGAGCAGATCAGCGAGTTCAGCAAGCGCGTG  
Cas9-HF1 3781 CAGCACAAGCACTACCTGGACGAGATCATCGAGCAGATCAGCGAGTTCAGCAAGCGCGTG  
evo-Cas9 3781 CAGCACAAGCACTACCTGGACGAGATCATCGAGCAGATCAGCGAGTTCAGCAAGCGCGTG  
Hypa-Cas9 3781 CAGCACAAGCACTACCTGGACGAGATCATCGAGCAGATCAGCGAGTTCAGCAAGCGCGTG  
xCas9-3.7 3781 CAGCACAAGCACTACCTGGACGAGATCATCGAGCAGATCAGCGAGTTCAGCAAGCGCGTG

Clone-1 3841 ATCCTGGCCGACGCCAACCTGGACAAGGTGCTGAGCGCCTACAACAAGCACCCGACAAAG  
Clone-2 3841 ATCCTGGCCGACGCCAACCTGGACAAGGTGCTGAGCGCCTACAACAAGCACCCGACAAAG  
Clone-3 3841 ATCCTGGCCGACGCCAACCTGGACAAGGTGCTGAGCGCCTACAACAAGCACCCGACAAAG  
WT-Cas9 3841 ATCCTGGCCGACGCCAACCTGGACAAGGTGCTGAGCGCCTACAACAAGCACCCGACAAAG  
eSpCas9 3841 ATCCTGGCCGACGCCAACCTGGACAAGGTGCTGAGCGCCTACAACAAGCACCCGACAAAG  
Cas9-HF1 3841 ATCCTGGCCGACGCCAACCTGGACAAGGTGCTGAGCGCCTACAACAAGCACCCGACAAAG  
evo-Cas9 3841 ATCCTGGCCGACGCCAACCTGGACAAGGTGCTGAGCGCCTACAACAAGCACCCGACAAAG  
Hypa-Cas9 3841 ATCCTGGCCGACGCCAACCTGGACAAGGTGCTGAGCGCCTACAACAAGCACCCGACAAAG  
xCas9-3.7 3841 ATCCTGGCCGACGCCAACCTGGACAAGGTGCTGAGCGCCTACAACAAGCACCCGACAAAG

Clone-1 3901 CCCATCCGCGAGCAGGCCGAGAACATCATCCACCTGTTTACCCTGACCAACCTGGGCGCC  
Clone-2 3901 CCCATCCGCGAGCAGGCCGAGAACATCATCCACCTGTTTACCCTGACCAACCTGGGCGCC  
Clone-3 3901 CCCATCCGCGAGCAGGCCGAGAACATCATCCACCTGTTTACCCTGACCAACCTGGGCGCC  
WT-Cas9 3901 CCCATCCGCGAGCAGGCCGAGAACATCATCCACCTGTTTACCCTGACCAACCTGGGCGCC  
eSpCas9 3901 CCCATCCGCGAGCAGGCCGAGAACATCATCCACCTGTTTACCCTGACCAACCTGGGCGCC  
Cas9-HF1 3901 CCCATCCGCGAGCAGGCCGAGAACATCATCCACCTGTTTACCCTGACCAACCTGGGCGCC  
evo-Cas9 3901 CCCATCCGCGAGCAGGCCGAGAACATCATCCACCTGTTTACCCTGACCAACCTGGGCGCC  
Hypa-Cas9 3901 CCCATCCGCGAGCAGGCCGAGAACATCATCCACCTGTTTACCCTGACCAACCTGGGCGCC  
xCas9-3.7 3901 CCCATCCGCGAGCAGGCCGAGAACATCATCCACCTGTTTACCCTGACCAACCTGGGCGCC

Clone-1 3961 CCCGCCGCTTCAAGTACTTCGACACCACCATCGACCGCAAGCGCTACACCAGCACCAAG  
Clone-2 3961 CCCGCCGCTTCAAGTACTTCGACACCACCATCGACCGCAAGCGCTACACCAGCACCAAG  
Clone-3 3961 CCCGCCGCTTCAAGTACTTCGACACCACCATCGACCGCAAGCGCTACACCAGCACCAAG  
WT-Cas9 3961 CCCGCCGCTTCAAGTACTTCGACACCACCATCGACCGCAAGCGCTACACCAGCACCAAG  
eSpCas9 3961 CCCGCCGCTTCAAGTACTTCGACACCACCATCGACCGCAAGCGCTACACCAGCACCAAG  
Cas9-HF1 3961 CCCGCCGCTTCAAGTACTTCGACACCACCATCGACCGCAAGCGCTACACCAGCACCAAG  
evo-Cas9 3961 CCCGCCGCTTCAAGTACTTCGACACCACCATCGACCGCAAGCGCTACACCAGCACCAAG  
Hypa-Cas9 3961 CCCGCCGCTTCAAGTACTTCGACACCACCATCGACCGCAAGCGCTACACCAGCACCAAG  
xCas9-3.7 3961 CCCGCCGCTTCAAGTACTTCGACACCACCATCGACCGCAAGCGCTACACCAGCACCAAG

Clone-1 4021 GAGGTGCTGGACGCCACCCTGATCCACCAGAGCATCACCGGTCTGTACGAGACCCGCATC  
Clone-2 4021 GAGGTGCTGGACGCCACCCTGATCCACCAGAGCATCACCGGTCTGTACGAGACCCGCATC  
Clone-3 4021 GAGGTGCTGGACGCCACCCTGATCCACCAGAGCATCACCGGTCTGTACGAGACCCGCATC  
WT-Cas9 4021 GAGGTGCTGGACGCCACCCTGATCCACCAGAGCATCACCGGTCTGTACGAGACCCGCATC  
eSpCas9 4021 GAGGTGCTGGACGCCACCCTGATCCACCAGAGCATCACCGGTCTGTACGAGACCCGCATC  
Cas9-HF1 4021 GAGGTGCTGGACGCCACCCTGATCCACCAGAGCATCACCGGTCTGTACGAGACCCGCATC  
evo-Cas9 4021 GAGGTGCTGGACGCCACCCTGATCCACCAGAGCATCACCGGTCTGTACGAGACCCGCATC  
Hypa-Cas9 4021 GAGGTGCTGGACGCCACCCTGATCCACCAGAGCATCACCGGTCTGTACGAGACCCGCATC  
xCas9-3.7 4021 GAGGTGCTGGACGCCACCCTGATCCACCAGAGCATCACCGGTCTGTACGAGACCCGCATC

Clone-1 4081 GACCTGAGCCAGCTGGGCGGGCAGCGCGGCTCCGGACCTCCAAAGAAAAAGAGAAAAGTA  
Clone-2 4081 GACCTGAGCCAGCTGGGCGGGCAGCGCGGCTCCGGACCTCCAAAGAAAAAGAGAAAAGTA  
Clone-3 4081 GACCTGAGCCAGCTGGGCGGGCAGCGCGGCTCCGGACCTCCAAAGAAAAAGAGAAAAGTA  
WT-Cas9 4081 GACCTGAGCCAGCTGGGCGGGCAGCGCGGCTCCGGACCTCCAAAGAAAAAGAGAAAAGTA  
eSpCas9 4081 GACCTGAGCCAGCTGGGCGGGCAGCGCGGCTCCGGACCTCCAAAGAAAAAGAGAAAAGTA  
Cas9-HF1 4081 GACCTGAGCCAGCTGGGCGGGCAGCGCGGCTCCGGACCTCCAAAGAAAAAGAGAAAAGTA  
evo-Cas9 4081 GACCTGAGCCAGCTGGGCGGGCAGCGCGGCTCCGGACCTCCAAAGAAAAAGAGAAAAGTA  
Hypa-Cas9 4081 GACCTGAGCCAGCTGGGCGGGCAGCGCGGCTCCGGACCTCCAAAGAAAAAGAGAAAAGTA  
xCas9-3.7 4081 GACCTGAGCCAGCTGGGCGGGCAGCGCGGCTCCGGACCTCCAAAGAAAAAGAGAAAAGTA

Clone-1 4141 TACCCCTACGACGTGCCCGACTACGCC  
Clone-2 4141 TACCCCTACGACGTGCCCGACTACGCC  
Clone-3 4141 TACCCCTACGACGTGCCCGACTACGCC  
WT-Cas9 4141 TACCCCTACGACGTGCCCGACTACGCC  
eSpCas9 4141 TACCCCTACGACGTGCCCGACTACGCC  
Cas9-HF1 4141 TACCCCTACGACGTGCCCGACTACGCC  
evo-Cas9 4141 TACCCCTACGACGTGCCCGACTACGCC  
Hypa-Cas9 4141 TACCCCTACGACGTGCCCGACTACGCC  
xCas9-3.7 4141 TACCCCTACGACGTGCCCGACTACGCC
